# Demography and linked selection interact to shape the genomic landscape of codistributed woodpeckers during the Ice Age

Short title: Demography and selection shape avian genomic landscape

Lucas R. Moreira<sup>1,2,3\*</sup>, John Klicka<sup>4</sup>, Brian Tilston Smith<sup>3</sup>

<sup>1</sup> Department of Ecology, Evolution, and Environmental Biology, Columbia University, New York, NY, USA.

<sup>2</sup> Department of Ornithology, American Museum of Natural History, New York City, NY, USA.

<sup>3</sup> Program in Bioinformatics and Integrative Biology, University of Massachusetts Chan Medical School, Worcester, MA, USA.

<sup>4</sup> Burke Museum of Natural History and Culture and Department of Biology, University of Washington, Seattle, WA, USA.

\* corresponding author, lr2767@columbia.edu

## Abstract

The glacial cycles of the Pleistocene had a global impact on the evolution of species. Although the influence of genetic drift on population genetic dynamics is well understood, the role of selection in shaping patterns of genomic variation during these dramatic climatic changes is less clear. We used whole genome resequencing data to investigate the interplay between demography and natural selection and their influence on the genomic landscape of Downy and Hairy Woodpecker, species co-distributed in previously glaciated North America. Our results revealed a dynamic population history with repeated cycles of bottleneck and expansion, and genetic structure associated with glacial refugia. Levels of nucleotide diversity varied substantially along the genomes of Downy and Hairy Woodpecker, but this variation was highly correlated between the two species, suggesting the presence of conserved genomic features. Nucleotide diversity in both species was positively correlated with recombination rate and negatively correlated with gene density, suggesting that linked selection played a role in reducing diversity in regions of low recombination and high density of targets of selection. Despite strong temporal fluctuations in  $N_e$ , our demographic analyses indicate that Downy and Hairy Woodpecker were able to maintain relatively large effective population sizes during glaciations, which might have favored natural selection. The magnitude of the effect of linked selection seems to have been modulated by the individual demographic trajectory of populations and species, such that purifying selection has been more efficient in removing deleterious alleles in Hairy Woodpecker owing to its larger long-term  $N_e$ . These results highlight that while drift captures the expected signature of contracting and expanding populations during climatic perturbations, the interaction of multiple processes produces a predictable and highly heterogeneous genomic landscape.

## 40 **Introduction**

41  
42 Pleistocene glacial cycles altered the distribution and evolution of entire communities [1,2]. Despite the  
43 profound impact glaciations had on the evolutionary trajectory of species, the majority of research on the  
44 topic has focused on how demographic dynamics have shaped neutral genetic variation [2,3]. Population  
45 expansion [4,5], genetic structuring in refugia [6–10], and decreased diversity in expanding populations  
46 [11–13] are among the most common patterns recovered. However, as species rapidly expanded and  
47 colonized areas under extreme environmental change they would have been subject to strong selective  
48 pressures, such as increased tolerance to cold and selection against deleterious mutations [14,15].  
49 Understanding how natural selection, along with genetic drift, interact with features of the genome to shape  
50 the genomic landscape of diversity and differentiation will clarify the broader significance of the Ice Age  
51 on the evolution of species.

52         Demography and natural selection play a central role shaping levels of genetic diversity, but their  
53 effects are intertwined [16–18]. Neutral genetic diversity ( $\theta$ ) is the product of the rate at which new alleles  
54 are generated (i.e., mutation rate  $\mu$ ) by the effective population size ( $N_e$ ), so that diversity levels are  
55 predicted to increase as a function of the size of populations (In diploids,  $\theta = 4N_e\mu$  [19,20]). On the other  
56 hand, fixation of beneficial alleles (selective sweep [21,22]) or removal of deleterious mutations  
57 (background selection [22–25]) can cause genetic diversity to decrease across the genome through the effect  
58 of linked selection [24]. Demographic perturbations that cause  $N_e$  to fluctuate over time and space (e.g.,  
59 glacial bottlenecks) are, therefore, expected to result in a larger accumulation of mildly deleterious alleles  
60 when compared to large populations with constant  $N_e$  because of the reduced efficacy of purifying selection  
61 when genetic drift is strong [26–30]. Hence, populations resulting from founder events, such as at the  
62 leading edge of a postglacial expansion, often show elevated genetic load [27,30,31].

63         Levels of diversity and differentiation along the genome also vary due to the differing effects of  
64 intrinsic genomic properties [32–36]. Genome features such as variation in mutation rate, recombination  
65 rate, distribution of functional elements, and nucleotide composition impact the rates at which genetic  
66 variants are produced, maintained, and lost [37]. Regions enriched for functional elements (e.g., coding  
67 sequences), for instance, tend to exhibit significantly lower levels of genetic diversity due to the recurrent  
68 effect of natural selection [33,38–40]. The loss of variation is further amplified by linkage disequilibrium  
69 (LD), which reduces diversity at neutrally-evolving sites in close proximity to the targets of selection  
70 (hitchhiking effect [21]). The extent to which linked selection affects neighboring sites depends on the  
71 recombination rate, which shows considerable genome-wide variation [41–44]. Larger reductions in  
72 nucleotide diversity are expected to occur in genomic regions enriched for functional elements and with  
73 lower recombination rates. A correlation between nucleotide diversity, gene density, and recombination

74 rate is therefore indicative that linked selection is at play. Quantifying covariance between evolutionarily  
75 independent species can help understand the interplay between these various conserved features of the  
76 genome and their impact on patterns of diversity and differentiation along the genome.

77 We aim to address drift-selection dynamics during the Pleistocene climatic cycles by estimating  
78 the impact of demography and linked selection on the genome of Downy (*Dryobates pubescens*) and Hairy  
79 (*D. villosus*) Woodpeckers, two co-distributed species that share similar ecologies and evolutionary  
80 histories. Downy and Hairy Woodpecker are year-round residents of a variety of habitats in North America,  
81 occurring in sympatry across an exceptionally broad geographic area from Alaska to Florida, although the  
82 range of the Hairy Woodpecker extends further south, reaching portions of Central America and the  
83 Bahamas [45]. Despite looking very similar, the two species are not sisters and share a common ancestor  
84 more than eight million years ago, without any evidence of recent hybridization [46,47]. During the glacial  
85 cycles of the Pleistocene, especially when the polar ice sheets reached their maximum extent (Last Glacial  
86 Maximum; 21 kya), a large portion of the present-day distribution of Downy and Hairy Woodpeckers were  
87 covered in ice, and populations of both species were restricted to southern refugia [12,48,49]. After the  
88 retreat of Pleistocene glaciers, Downy and Hairy Woodpeckers extended their distributions north,  
89 recolonizing higher latitudes. Phylogeographical studies in Downy and Hairy Woodpecker revealed that  
90 populations currently inhabiting previously glaciated areas show strong signatures of population expansion  
91 and population structuring consistent with multiple glacial refugia [12,48–51]. This shared demographic  
92 history provides an opportunity to investigate multiple genomic factors that might have impacted the  
93 distribution of diversity across populations and within the genomes of these two natural evolutionary  
94 replicates.

95 In this study, we generated whole-genome resequencing data for Downy and Hairy Woodpeckers  
96 to test whether the heterogeneous genomic landscape of diversity and differentiation in both taxa is  
97 correlated with intrinsic features of the genome, such as recombination rate and gene density, and whether  
98 differences in demographic history had an impact on the efficacy of selection. We hypothesize that if linked  
99 selection reduced diversity at linked neutral sites along the genome, local levels of nucleotide diversity  
100 should be correlated with the rate of recombination and the density of targets of selection. In addition, we  
101 predict that if the efficiency of selection is a function of the demographic trajectory of populations during  
102 the Ice Age, large and more stable populations (i.e., larger long-term  $N_e$ ) will exhibit lower genetic load  
103 and a stronger correlation between nucleotide diversity and intrinsic genomic properties, such as  
104 recombination rate. These results have implications for our understanding of the relative importance of  
105 neutral and selective processes on the evolution of the genomic landscape of species heavily impacted by  
106 glaciations.

107 **Results**

108 *Congruent population structure and genetic diversity*

109 We characterized population genetic structure in Downy and Hairy Woodpeckers across an array of  
110 ecological zones that would have been subject to varying effects of Pleistocene climatic cycles. We  
111 collected whole genomes of 70 individuals each of Downy and Hairy Woodpecker (140 total samples;  
112 Table S1), representing seven geographic locations in North America: Northeast (NE), Southeast (SE),  
113 Midwest (MW), Southern Rockies (SR), Northern Rockies (NR), Pacific Northwest (NW), and Alaska  
114 (AK; Figure 1a–b). Sequenced reads were mapped to a pseudo-reference genome of Downy Woodpecker  
115 [52], yielding an average sequencing depth of 5.1x (1.4–12.5x) for Downy Woodpecker and 4.5x (1.1–  
116 11.7x) for Hairy Woodpecker. A total of 16,736,465 and 15,463,356 single nucleotide polymorphisms  
117 (SNPs) were identified in the Downy and Hairy Woodpecker genomes, respectively, using the genotype  
118 likelihood approach implemented in ANGSD [53].

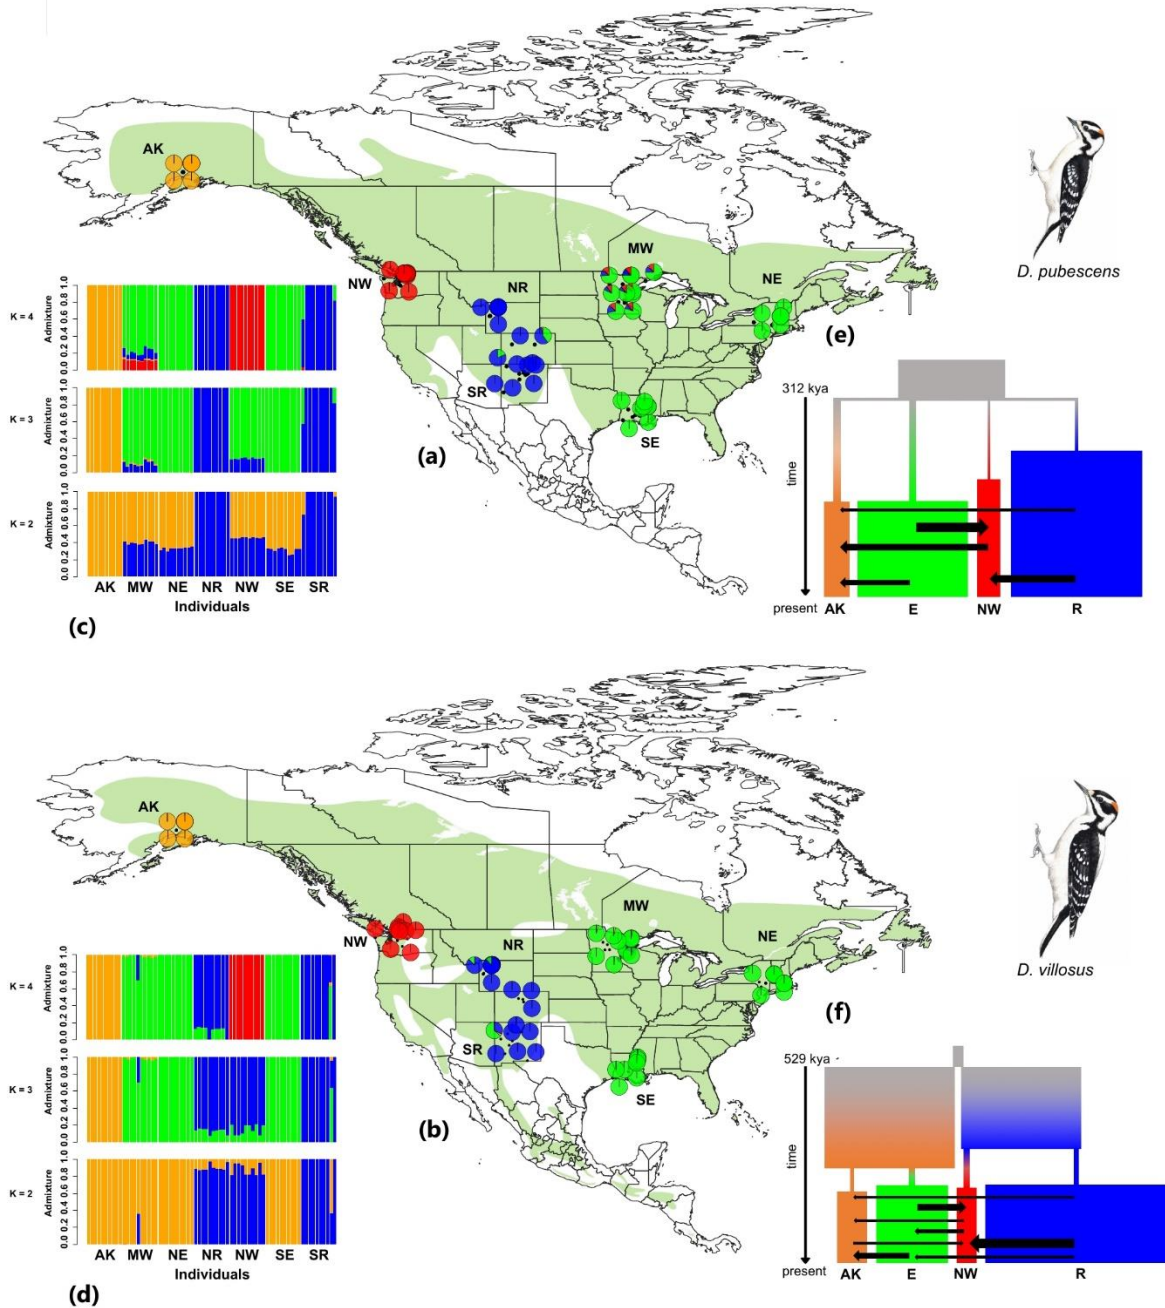

119  
 120 **Figure 1. Geographic distribution of genetic variation and demographic history of the Downy (*D.***  
 121 ***pubescens*; top) and Hairy Woodpecker (*D. villosus*; bottom). (a-b) Results of the *NGSadmix* analysis**  
 122 **for the  $K = 2-4$ . Each bar indicates an individual's estimated ancestry proportion for each genetic cluster,**  
 123 **represented by different colors. (c-d) Map indicating the current range of Downy and Hairy Woodpecker**  
 124 **(green shade), the locality of the samples, and their respective admixture proportions from *NGSadmix* (pie**  
 125 **charts). (e-f) The best-fit demographic models from *fastsimcoal2*. The width of the rectangles and arrows**  
 126 **are scaled relative to the estimated effective population sizes in haploid individuals ( $N_e$ ) and the migration**  
 127 **rate ( $m$ ) in fraction of haploid individuals from donor population per generation, respectively. Only the**  
 128 **values of migration rate  $> 10^{-7} \times N_e$  migrants per generation are shown. Illustrations reproduced with**  
 129 **permission from Lynx Edicions.**

130 To assess patterns of genetic differentiation among these broadly distributed populations, we first  
131 performed a principal component analysis (PCA) on a subset of 71,229 and 71,816 independently-evolving  
132 (linkage disequilibrium  $r^2 < 0.2$ ) SNPs for Downy and Hairy Woodpecker, respectively. The three first  
133 principal components (PCs) explained together 7.5% (Downy) and 8.3% (Hairy) of the total genetic  
134 variance. We recovered congruent genetic structure across both species' ranges (Figure 2a,c). Geographic  
135 structure was generally characterized by a genetic discontinuity between boreal-eastern and western  
136 populations. In Downy Woodpecker, however, the Pacific Northwest population fell more closely related  
137 to the Eastern group than the Western group (Figure 2a). Consistent with these findings, *NGSadmix* [54]  
138 supported four geographically congruent genetic clusters ( $K=4$ ) in the Downy and Hairy Woodpecker: East  
139 (NE, SE, and MW), Pacific Northwest (NW), Rocky Mountains (SR and NR), and Alaska (AK; Figure 1c–  
140 d). The average genome-wide estimate of  $F_{ST}$  was slightly larger in Hairy Woodpecker (average  $F_{ST} = 0.1$ ;  
141 0.03–0.19) than Downy Woodpecker (average  $F_{ST} = 0.08$ ; 0.03–0.16), indicating larger (but overlapping)  
142 levels of population differentiation. In both species, the largest values of  $F_{ST}$  involved comparisons between  
143 Alaska and other populations (Downy:  $F_{ST}$  [AK vs NR] = 0.16; Hairy:  $F_{ST}$  [AK vs SR] = 0.19), and the  
144 lowest were within the East and the Rocky Mountains clusters (Downy:  $F_{ST} = 0.03$ –0.06; Hairy:  $F_{ST} = 0.03$ –  
145 0.04).

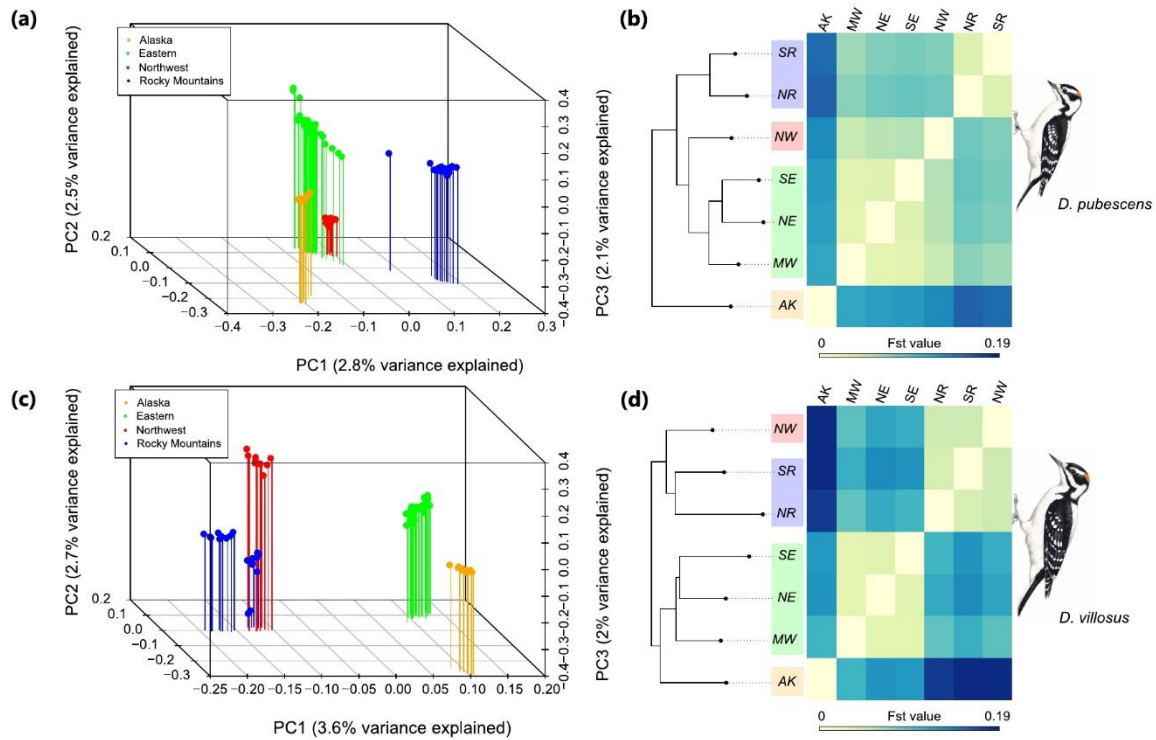

146  
 147 **Figure 2. Population genetic structure in the Downy (top) and Hairy (bottom) Woodpecker.** (a,c)  
 148 Principal component analysis (PCA) of Downy and Hairy Woodpecker based on 71,228 and 71,763  
 149 unlinked genome-wide SNPs, respectively, with < 25% missing data and a minor allele frequency (maf) >  
 150 0.05. (b,d) Heatmap showing genome-wide pairwise  $F_{ST}$  values (left) and associated maximum likelihood  
 151 tree based on the polymorphism-aware phylogenetic model (PoMo) in IQ-Tree 2. All nodes show 100%  
 152 bootstrap support. Darker colors on the heatmap correspond to larger values of  $F_{ST}$ . Illustrations  
 153 reproduced with permission from Lynx Edicions.

154 Because the expansion and contraction of glaciers were expected to impact population structuring  
 155 across the landscape, we explored spatial patterns of gene flow using the estimated effective migration  
 156 surface (EEMS [55]). EEMS compares pairwise genetic dissimilarity among localities to identify  
 157 geographic areas that deviate from the null expectation of isolation by distance (IBD). In both species, we  
 158 detected a pronounced reduction in effective migration near the Great Plains and along the Rocky  
 159 Mountains, especially in its Northern portion. In contrast, eastern North America showed a higher degree  
 160 of connectivity when compared to the west (Figure 3). This finding indicates that major topographic  
 161 features and variation in habitat availability contributed to the maintenance of population differentiation,  
 162 despite the presence of gene flow.

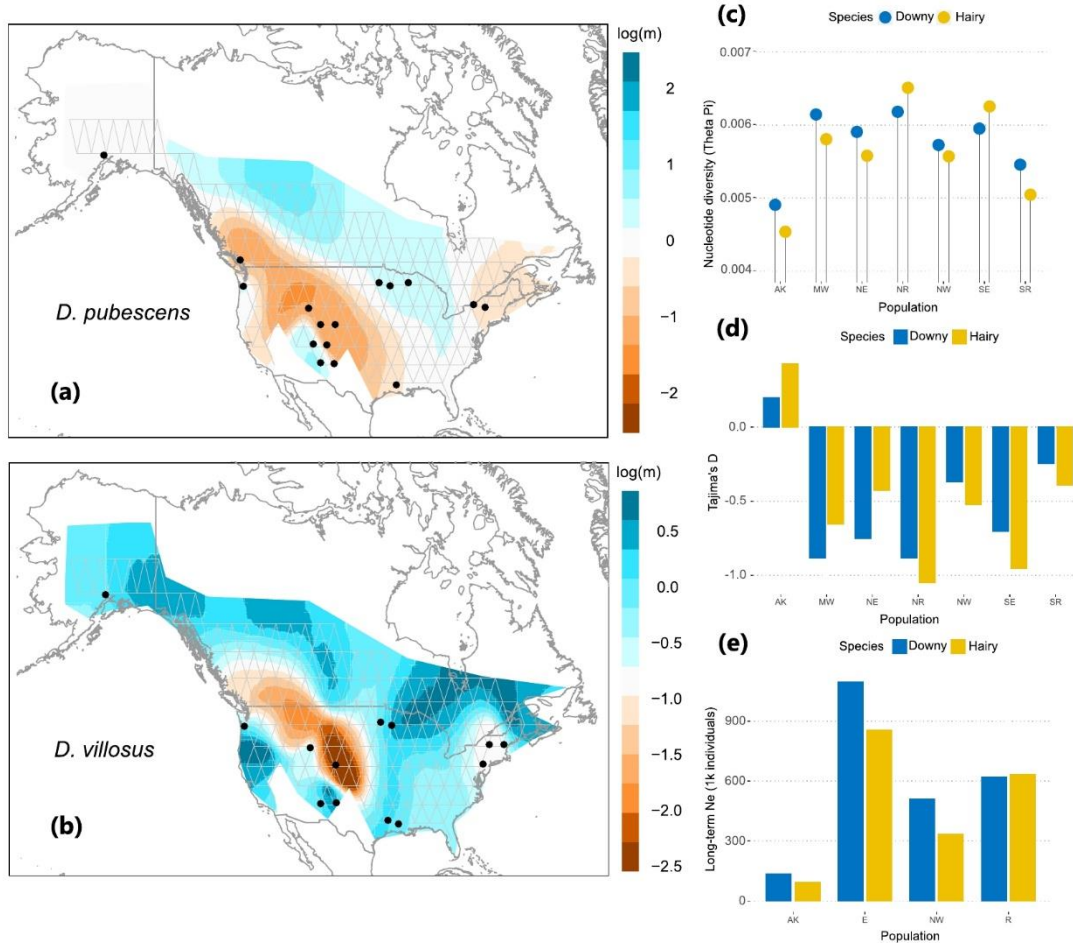

163  
 164 **Figure 3. Spatial patterns of gene flow and genome-wide genetic variation in Downy and Hairy**  
 165 **Woodpecker. (a)** Effective migration surface inferred by EEMS in Downy Woodpecker and **(b)** Hairy  
 166 Woodpecker. Warmer colors indicate lower and colder colors indicate higher effective migration (on a  
 167 log scale) relative to the overall migration rate over the species range. Triangles represent the grid chosen  
 168 to assign sampling locations to discrete demes. **(c)** Genome-wide pairwise nucleotide diversity ( $\theta_\pi$ ) per  
 169 population. **(d)** Genome-wide Tajima's D per population. **(e)** The harmonic mean of effective population  
 170 size ( $N_e$ ) estimated over the past one million years with Stairway Plot 2 for all four genetic clusters.

171  
 172 *Demographic history*

173  
 174 We tested for signatures of Quaternary climatic oscillations on population dynamics of Downy and Hairy  
 175 Woodpecker by assessing changes in  $N_e$  over time and estimating demographic parameters. First, we  
 176 employed Stairway Plot 2 [56] to infer fluctuations in  $N_e$  over the past 500k years in each of the four  
 177 detected genetic clusters assumed to represent panmictic populations. Stairway Plot 2 uses the site  
 178 frequency spectrum (SFS) to fit a flexible multi-epoch model of changes in population size. For all



179 demographic analyses, we used the folded SFS and specified a mutation rate of  $4.007 \times 10^{-9}$  mutations per  
180 site per generation and a generation time of one year for both species [57]. Changes in effective population  
181 size over time were generally consistent between both species, being characterized by recurrent episodes  
182 of bottleneck followed by population expansion (Figure 4a–b). We found that within each genetic cluster,  
183 nucleotide diversity was highly correlated with the harmonic mean of the  $N_e$  estimated from Stairway Plot  
184 2 over the past 500 kya (long-term  $N_e$ ; linear regression:  $t = 4.876$ ;  $R^2 = 0.76$ ;  $p < 0.002$ ; Figure S1),  
185 indicating these independent analyses were consistent.  
186

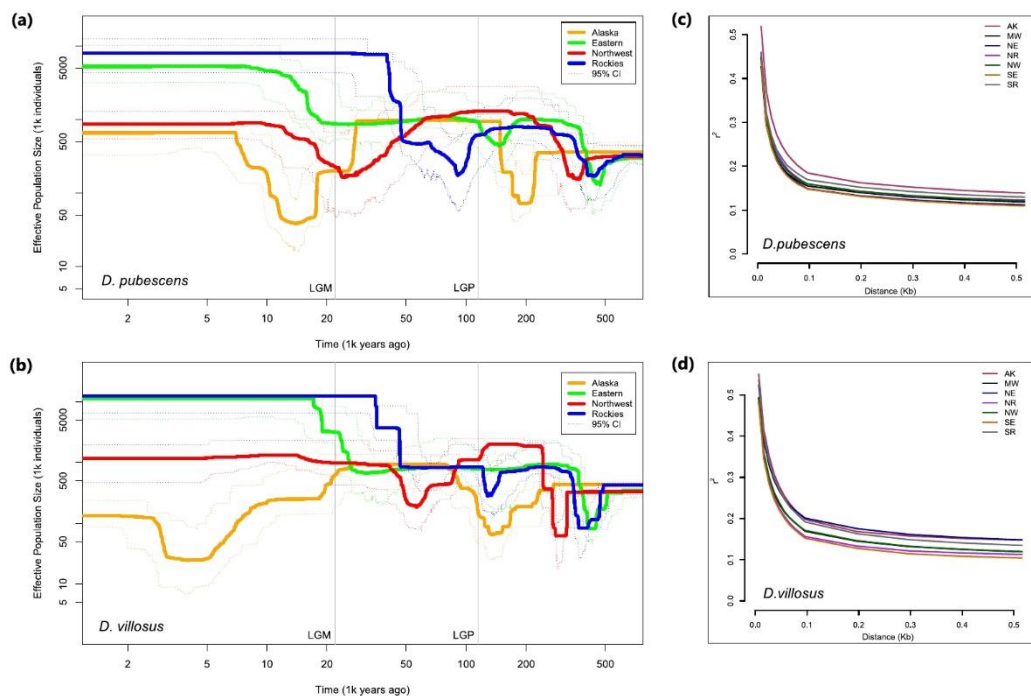

187  
188 **Figure 4. Changes in effective population size ( $N_e$ ) over time and linkage disequilibrium (LD) in**  
189 **Downy (top) and Hairy (bottom) Woodpecker. (a–b)** Inferred history of effective population size of all  
190 four genetic clusters in Downy (a) and Hairy Woodpecker (b) obtained with Stairway Plot 2 using the  
191 folded SFS. For this analysis, we specified a mutation rate of  $4.007 \times 10^{-9}$  mutations per site per  
192 generation. Both axes are represented in a log scale. Dotted lines represent 95% confidence intervals, and  
193 vertical lines represent the Last Glacial Period (LGP; 115 kya) and the Last Glacial Maximum (LGM; 21  
194 kya). (c–d) Decay of linkage disequilibrium (LD) in all seven populations of Downy (c) and Hairy (d)  
195 Woodpecker.

196 To further elucidate the evolutionary relationships among populations of Hairy and Downy  
197 Woodpecker, we built a rooted maximum likelihood tree from genome-wide intergenic SNPs using the IQ-

198 TREE polymorphism-aware phylogenetic model (PoMo [58,59]). The topology for Hairy Woodpecker  
199 showed two distinct clades – an East + Alaska and a West clade. The tree for Downy Woodpecker, however,  
200 revealed a different topology. First, the Pacific Northwest population (NW) was more closely related to the  
201 eastern clade than to the western clade, supporting our PCA analysis. In addition, the Alaska (AK)  
202 population was sister to all other populations. Two hypotheses could explain this pattern: either (i) Alaska  
203 was a distinctive clade that differentiated from the other Downy Woodpecker populations as a consequence  
204 of persistence in a separate glacial refugium near Beringia, as has been suggested for other North American  
205 taxa [2,60,61], or (ii) the topology of the Downy Woodpecker population tree was more reflective of other  
206 factors, such as patterns of gene flow and geographic distance among localities, as opposed to the actual  
207 order of population splits. If this was the case, then we expect the relationships among populations to better  
208 fit a polytomous tree rather than a bifurcating tree.

209 To test these alternative population histories, we used the SFS-based method *fastsimcoal2* v2.6.0.3  
210 [62] to estimate demographic parameters and evaluate the support for two alternative models – (i) a model  
211 where all populations diverge synchronously from a single ancestral refugium and expand independently  
212 with asymmetric gene flow, and (ii) a bifurcating model where populations diverge at different times from  
213 multiple refugia (e.g., Beringia and East or East and West) and expand independently with asymmetric gene  
214 flow, following the IQ-TREE topology.

215 Demographic analyses with *fastsimcoal2* show differing support for alternative demographic  
216 models among the two focal species. The best-supported model for Hairy Woodpecker was model ii (Table  
217 S2; Figure 1f), in which two ancestral populations (putatively located in East and West) diverged from each  
218 other around 529 kya (95% CI = 513–561 kya; Table S3) and gave rise to the four genetic clusters, which  
219 then underwent strong bottlenecks. A final explosive expansion then occurred between 193–212 kya when  
220 populations grew up to 12-fold. In contrast, Downy Woodpecker showed support for model i, in which all  
221 populations diverge from a single major refugium (Table S2; Figure 1e). This divergence occurred around  
222 312 kya (95% CI = 146–551 kya; Table S3) and was accompanied by a large bottleneck, reducing  $N_e$  to  
223 less than 10% of its original size in most populations. A final population expansion then occurred at the end  
224 of the Mid-Pleistocene (152–232 kya). Overall, estimates of  $N_e$  from *fastsimcoal2* confirmed the trends  
225 observed in Stairway Plot 2, albeit with less resolution. We found large and variable levels of post-  
226 expansion gene flow across populations in both species (Downy: 0–4.8 migrants per generation; Hairy: 0–  
227 6.66 migrants per generation) that confirmed our EEMS migration surfaces.

## 228 *Genomic correlates of nucleotide diversity and differentiation*

229 To elucidate the evolutionary processes shaping levels of genetic variation along the genome of Downy and  
230 Hairy Woodpecker, we investigated the correlation between regional levels of nucleotide diversity,

231 measured across non-overlapping 100 kb windows, and three genomic features: recombination rate, gene  
232 density, and base composition. We found that nucleotide diversity varied widely along the genome ( $\theta_{\pi \text{ Downy}}$   
233  $= 7.5 \times 10^{-4}$ – $1.9 \times 10^{-2}$ ;  $\theta_{\pi \text{ Hairy}} = 1.1 \times 10^{-3}$ – $2.2 \times 10^{-2}$ ), but this variation was highly correlated between  
234 Downy and Hairy Woodpecker (Pearson's  $r = 0.9$ ;  $p < 0.001$ ; Figure S2). To estimate recombination rates,  
235 we used ReLERNN [63], a method that uses a machine-learning approach to infer per-base recombination  
236 rates. We found recombination rates to be highly correlated between the two species (Pearson's  $r = 0.66$ ;  $p$   
237  $< 0.001$ ). Across the genome, we estimated a mean per-base recombination rate ( $r$ ) =  $2.42 \times 10^{-9}$  c/bp (0–  
238  $3.87 \times 10^{-9}$ ) in Downy Woodpecker and  $r = 3.69 \times 10^{-9}$  c/bp ( $4.85 \times 10^{-10}$ – $3.87 \times 10^{-9}$ ) in Hairy Woodpecker.  
239 Considering the average long-term  $N_e$  of Downy and Hairy Woodpecker as approximately  $1 \times 10^6$  in the  
240 East population, these recombination rates correspond to a population-scaled rate  $\rho = 4N_e r = 0.008$  and  
241  $0.012$ , respectively. Mean recombination rates were 2–3-fold higher in autosomal chromosomes compared  
242 to the sex-linked Z chromosome (Figure S3–4), consistent with differences in  $N_e$  between sex chromosomes  
243 [64–66]. As a result of both high recombination rates and large  $N_e$ , we also observed that linkage  
244 disequilibrium (LD) in Downy and Hairy Woodpecker decays very rapidly. LD drops to half of its initial  
245 levels in less than 100 bp (Figure 5c–d). Consistently, the average LD was greater for populations with  
246 smaller  $N_e$  or populations that have likely experienced a more recent founder event, such as Alaska and the  
247 Southern Rockies. We found a significant positive association between nucleotide diversity ( $\theta_{\pi}$ ) and  
248 recombination rates in both species (linear regression – Downy:  $t = 47.67$ ,  $R^2 = 0.165$ ,  $p < 0.001$ ; Hairy:  $t$   
249  $= 54.17$ ,  $R^2 = 0.204$ ,  $p < 0.001$ ; LOESS regression – Downy:  $\text{span} = 0.5$ ,  $R^2 = 0.207$ ; Hairy:  $\text{span} = 0.5$ ,  $R^2$   
250  $= 0.207$ ; Figure 5a–b). This association, however, is expected (to a certain extent) even if diversity is not  
251 correlated with recombination rates because recombination rates are estimated directly from  $\theta_w$ .

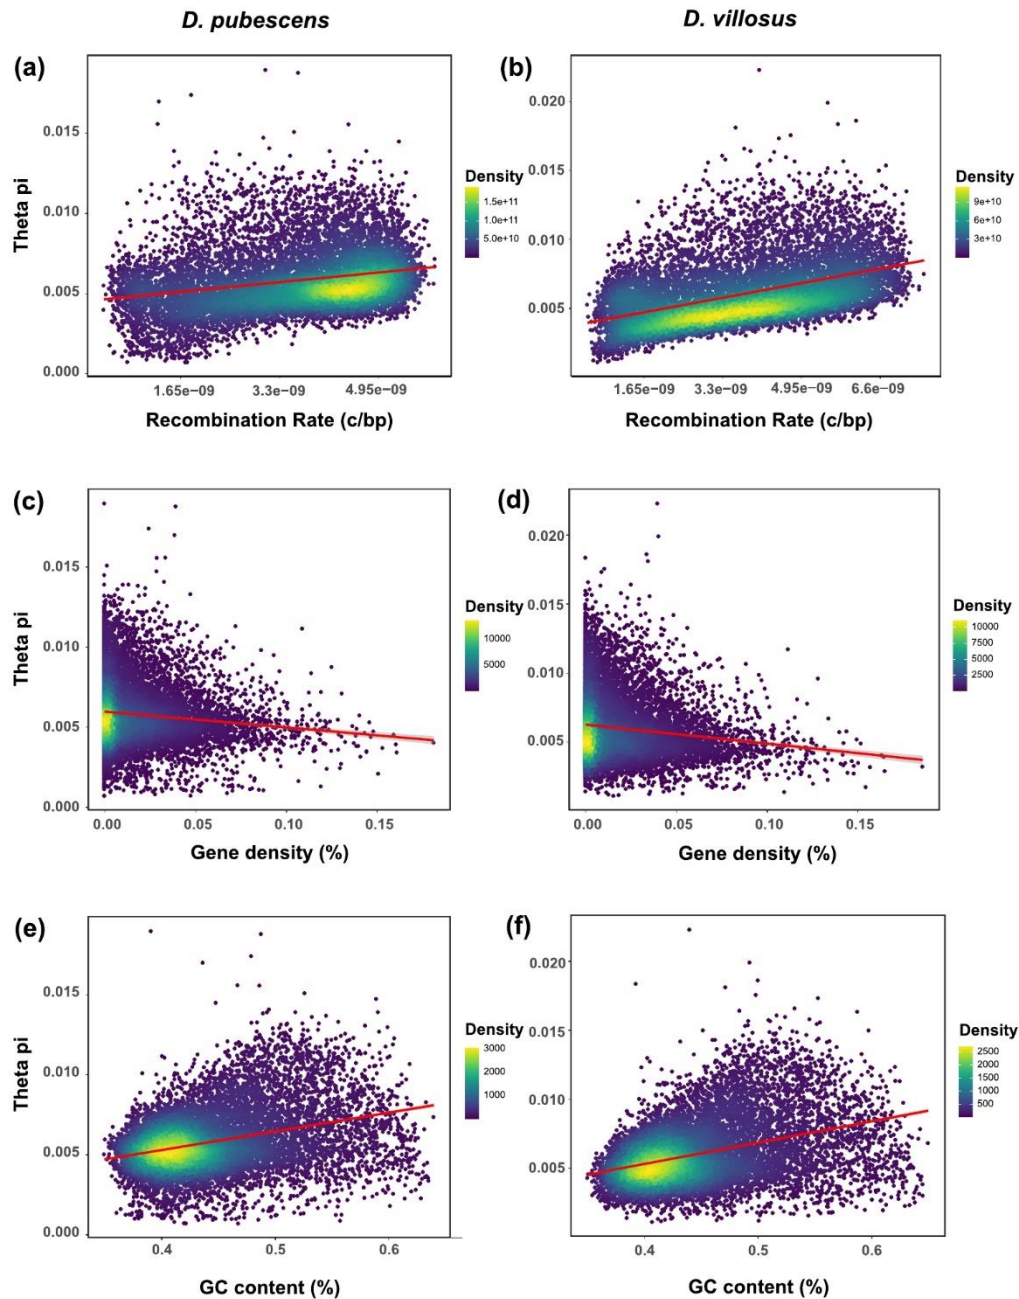

252  
253  
254  
255  
256  
257  
258

**Figure 5. Genomic predictors of nucleotide diversity in Downy (left) and Hairy (right) Woodpecker.** Association between nucleotide diversity ( $\theta_\pi$ ) and three features of the genome: (a–b) recombination rates (Downy:  $t = 47.67$ ,  $p < 0.001$ ; Hairy:  $t = 54.17$ ,  $p < 0.001$ ), (c–d) gene density (Downy:  $t = -12.03$ ,  $p < 0.001$ ; Hairy:  $t = -14.89$ ,  $p < 0.001$ ), and (e–f) GC content (Downy:  $t = 36.37$ ,  $p < 0.001$ ; Hairy:  $t = 44.16$ ,  $p < 0.001$ ). Each point in the scatter plot represents a 100 kb window of the genome. Colors indicate the density of points.

259 To further investigate the impact of linked selection on the genomic landscape of diversity, we also  
260 tested the prediction that regions of the genome with a higher density of targets of selection (i.e., genes)  
261 exhibit lower nucleotide diversity. Gene density was measured as the percentage of coding sequence in  
262 each of the 100 kb windows. Our results revealed a weak but significant negative association between  
263 nucleotide diversity ( $\theta_{\pi}$ ) and gene density (linear regression – Downy:  $t = -12.03$ ,  $R^2 = 0.0123$ ,  $p < 0.001$ ;  
264 Hairy:  $t = -14.89$ ,  $R^2 = 0.0189$ ,  $p < 0.001$ ; LOESS regression – Downy: span = 0.5,  $R^2 = 0.0139$ ; Hairy:  
265 span = 0.5,  $R^2 = 0.021$ ; Figure 5c–d). This association was not driven by the collinearity between gene  
266 density and recombination because this correlation was positive and negligible (Downy: Pearson's  $r =$   
267  $0.045$ ,  $p < 0.001$ ; Hairy: Pearson's  $r = 0.032$ ,  $p < 0.001$ ). We also found that regions with high GC content  
268 tended to show higher nucleotide diversity (linear regression – Downy:  $t = 36.37$ ,  $R^2 = 0.0123$ ,  $p < 0.001$ ;  
269 Hairy:  $t = 44.16$ ,  $R^2 = 0.145$ ,  $p < 0.001$ ; Figure 5e–f). GC content, however, was positively correlated with  
270 gene density in both species (Downy: Pearson's  $r = 0.25$ ;  $p < 0.001$ ; Hairy: Pearson's  $r = 0.25$ ;  $p < 0.001$ ;  
271 Figure S5–6) and weakly correlated with recombination rates in Hairy Woodpecker (Pearson's  $r = 0.064$ ;  
272  $p < 0.001$ ; Figure S5–6). We then performed a principal component regression (PCR) to separate the effect  
273 of individual explanatory variables and control for the multicollinearity among predictor variables.  
274 Principal component regression summarizes variables into orthogonal components (PCs) and uses these  
275 components as predictors in a linear regression. PC2, which represented almost exclusively recombination  
276 rates (Table 1), uniquely explained 12.3% and 18.6% of variation in nucleotide diversity in Downy and  
277 Hairy Woodpecker, respectively (PC2 linear regression – Hairy:  $t = 51.1$ ,  $R^2 = 0.186$ ,  $p < 0.001$ ; Downy:  $t$   
278  $= 40.14$ ,  $R^2 = 0.123$ ,  $p < 0.001$ ). Both PC1 and PC3 represented the correlation between gene density and  
279 GC content, but PC3 had a much stronger effect (Table 1), accounting for 14.4% and 15.5% of the variation  
280 in nucleotide diversity in Downy and Hairy Woodpecker, respectively (PC3 linear regression – Downy:  $t$   
281  $= 45.92$ ,  $R^2 = 0.155$ ,  $p < 0.001$ ; Hairy:  $t = 43.97$ ,  $R^2 = 0.144$ ,  $p < 0.001$ ). Considering that gene density and  
282 GC content had an equal contribution to PC3 (Table 1), we were unable to differentiate their relative  
283 contributions to the relationship. Regardless, our analyses confirm the central role that these genomic  
284 properties played in shaping patterns of nucleotide diversity along the genome.

285  
286  
287  
288  
289  
290  
291  
292  
293  
294

295

**Table 1. Principal component regression.**

| Species          | Explanatory variables | % of variance explained ( $R^2$ ) |       |       |
|------------------|-----------------------|-----------------------------------|-------|-------|
|                  |                       | PC1                               | PC2   | PC3   |
| Downy Woodpecker | Recombination rate    | 0.08                              | 11.89 | 0.11  |
|                  | Gene density          | 1.7                               | 0.03  | 7.8   |
|                  | GC content            | 1.65                              | 0.36  | 7.58  |
|                  | Total                 | 3.45                              | 12.3  | 15.51 |
| Hairy Woodpecker | Recombination rate    | 0.35                              | 17.35 | 0.01  |
|                  | Gene density          | 2.84                              | 1.02  | 7     |
|                  | GC content            | 2.96                              | 0.06  | 7.34  |
|                  | Total                 | 6.18                              | 18.6  | 14.47 |

296

297

298

299

300

301

302

303

304

305

306

307

308

309

310

311

312

313

The effect of linked selection is expected to be weaker in populations that underwent more severe bottlenecks due to their smaller long-term  $N_e$  when compared to stable populations that maintained large  $N_e$  [67,68]. We tested this prediction by quantifying the strength of correlation between nucleotide diversity ( $\theta_\pi$ ) and gene density in all four genetic clusters of Downy and Hairy Woodpecker which showed varied demographic responses to the Pleistocene glaciations. We found that long-term  $N_e$  predicted the coefficient of correlation between genetic diversity and the density of targets of selection (Table 2). Alaska, for example, showed the weakest correlation (Downy: Pearson's  $r = -0.1008$ ,  $t = -10.8$ ,  $p < 0.001$ ; Hairy: Pearson's  $r = -0.1083$ ,  $t = -11.6$ ,  $p < 0.001$ ), whereas Rocky Mountains showed the strongest (Downy: Pearson's  $r = -0.1106$ ,  $t = -11.9$ ,  $p < 0.001$ ; Hairy: Pearson's  $r = -0.1351$ ,  $t = -14.5$ ,  $p < 0.001$ ). Although the differences in coefficients were small, these results support the expectation that different demographic trajectories affect the efficacy of natural selection owing to differences in levels of genetic drift.

314 **Table 2. Strength of correlation between nucleotide diversity ( $\theta_{\pi}$ ) and gene density across the**  
315 **four genetic clusters of Downy and Hairy Woodpecker.**

| Populations | Downy Woodpecker |         | Hairy Woodpecker |         |
|-------------|------------------|---------|------------------|---------|
|             | Pearson's r      | t-value | Pearson's r      | t-value |
| AK          | -0.1008*         | -10.867 | -0.1083*         | -11.643 |
| NW          | -0.1007*         | -10.847 | -0.1384*         | -12.966 |
| E           | -0.1077*         | -11.618 | -0.1215*         | -13.084 |
| R           | -0.1106*         | -11.927 | -0.1351*         | -14.571 |

316 \*  $p < 0.001$ .

317 Because genomic properties are also expected to impact levels of population differentiation across  
318 the genome, we also tested the association between nucleotide diversity, recombination rate, and the  
319 average intraspecific population differentiation ( $F_{ST}$ ) across non-overlapping 100 kb windows. For each  
320 window, we calculated the  $F_{ST}$  between each pair of populations and summarized the global  $F_{ST}$  landscape  
321 using two approaches: (i) the average  $F_{ST}$  across all population pairs; and (ii) the first principal component  
322 (PC1) explaining most of the variation in pairwise  $F_{ST}$  (Downy: variance explained = 37.51%; Hairy:  
323 variance explained = 47.5%). Summaries of  $F_{ST}$  produced by these two approaches were highly correlated  
324 (Downy: Pearson's  $r = 0.97$ ;  $p < 0.001$ ; Hairy: Pearson's  $r = 0.98$ ;  $p < 0.001$ ), so we only considered the  
325 average  $F_{ST}$  for simplicity. There was considerable variation in  $F_{ST}$  along the genome (Downy:  $F_{ST} = 0.01$ –  
326 0.25; Hairy:  $F_{ST} = 0.01$ –0.32), indicating high variability in patterns of population differentiation. We  
327 recovered a significant negative association between average  $F_{ST}$  and nucleotide diversity, suggesting that  
328 areas of genome that show elevated differentiation tend to be characterized by reduced diversity (linear  
329 regression – Downy:  $t = -19.12$ ,  $R^2 = 0.03$ ;  $p < 0.001$ ; Hairy:  $t = -53.49$ ,  $R^2 = 0.2$ ;  $p < 0.001$ ; Figure 6).  
330 Finally, we found a negative association between average  $F_{ST}$  and recombination rates, indicating higher  
331 differentiation in regions of low recombination (linear regression – Downy:  $t = -32.18$ ,  $R^2 = 0.08$ ;  $p < 0.001$ ;  
332 Hairy:  $t = -41.55$ ,  $R^2 = 0.13$ ;  $p < 0.001$ ).

333

334

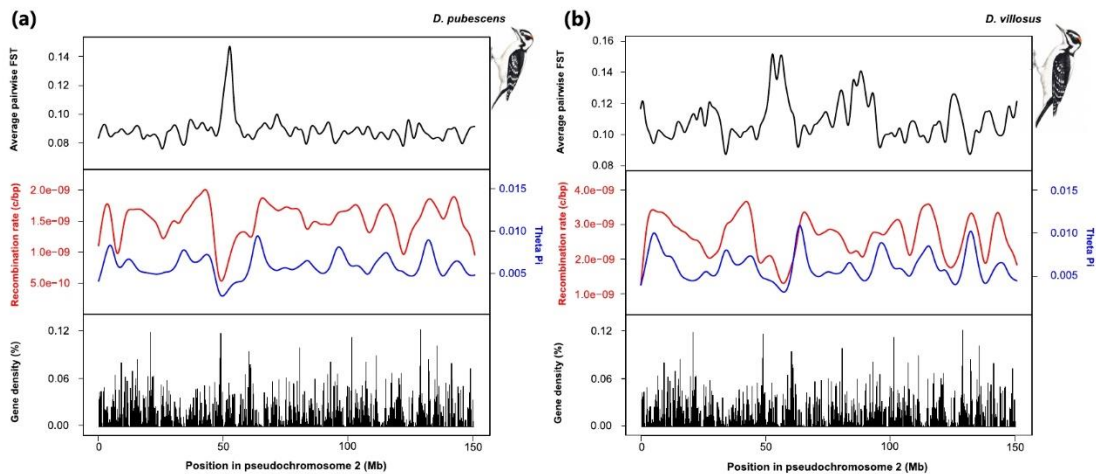

335  
336 **Figure 6. Landscape of diversity and differentiation of chromosome 2 of Downy (a) and Hairy (b)**  
337 **Woodpecker for illustration.** Top plot shows the average pairwise  $F_{ST}$  calculated across non-overlapping  
338 100 kb windows. Middle plot indicates the recombination rate in c/bp (red) and the nucleotide diversity  
339 ( $\theta_\pi$ ; blue) for each non-overlapping 100 kb window. Bottom plot represents the percentage of coding  
340 sequence in each non-overlapping 100 kb window. Illustrations reproduced with permission from Lynx  
341 Edicions.

342  
343 *Genetic load and the efficacy of selection*

344  
345 To further explore the magnitude of linked selection in the genome of Downy and Hairy Woodpecker, we  
346 classified each variant according to their functional impact as predicted by the gene annotation. We found  
347 that the majority of identified SNPs in Downy and Hairy Woodpecker were classified as modifiers (Downy:  
348 99.35%; Hairy: 99.13%), which are variants in intergenic or intronic regions whose impacts are hard to  
349 determine but tend to be neutral to nearly neutral. Low impact variants (i.e., synonymous mutations)  
350 characterized 0.46% and 0.64% of SNPs in Downy and Hairy Woodpecker, respectively. Moderate impact  
351 variants, mutations that cause a change in amino acid sequence (i.e., nonsynonymous mutations)  
352 represented 0.17% and 0.22% of the SNPs in Downy and Hairy Woodpecker, respectively. Finally, only  
353 0.006% and 0.007% of the SNPs were classified as high impact in Downy and Hairy Woodpecker,  
354 respectively. These variants correspond to mutations that cause loss of function, such as loss or gain of a  
355 start or stop codon and are therefore expected to occur at very low frequencies.

356 We investigated differences in the burden of deleterious alleles carried by populations of Downy  
357 and Hairy Woodpecker that could reflect differences in the efficacy of purifying selection. For this analysis,  
358 we focused on sites that were polymorphic in at least one of the two species and whose ancestral states



359 could be determined unambiguously. Our results revealed that the frequency distribution of mutations with  
360 moderate and high impact shifted downwards compared to the mutations with low impact (Figure 7a–b).  
361 This indicates that purifying selection was successful in purging mutations that were highly deleterious.  
362 Hairy Woodpecker, however, showed a larger excess of low frequency mutations of high impact when  
363 compared to Downy Woodpecker (Figure 7a–b), suggesting that purifying selection might have been more  
364 efficient in Hairy Woodpecker. To further evaluate whether the efficacy of purifying selection varied across  
365 populations with different demographic trajectories, we estimated for each individual the genetic load as  
366 the ratio of the count of homozygous derived alleles of high impact (i.e., highly deleterious) over the count  
367 of homozygous derived alleles of low impact (i.e., synonymous). This metric is a proxy for the genetic load  
368 under a recessive model while controlling for the underlying population differences in the neutral SFS  
369 [69,70]. We also computed the same metric considering an additive model, in which the presence of a single  
370 copy of the derived allele has fitness consequences. Our results reveal that the recessive deleterious load  
371 was overall larger in Downy than Hairy Woodpecker, but this difference was not statistically significant  
372 (Kruskal-Wallis  $\chi^2 = 1.33$ ,  $df = 1$ ,  $p = 0.24$ ; Figure 7c–d). The recessive deleterious load was much larger in  
373 the Rocky Mountains when compared to other populations. Alaska also showed elevated recessive  
374 deleterious load in both species, generally larger than the East and Pacific Northwest (Figure 7c–d). Overall,  
375 these findings do not support the prediction that populations with stronger bottlenecks exhibit high  
376 deleterious load.  
377

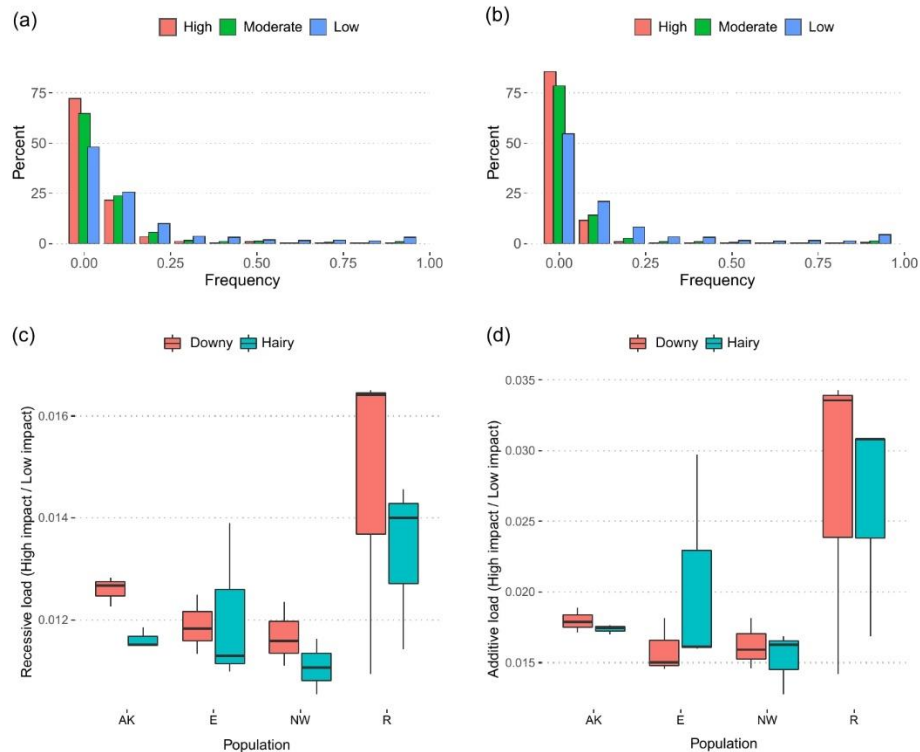

378  
379 **Figure 7. Deleterious load in Downy and Hairy Woodpecker.** (a) Site frequency spectrum (SFS) for  
380 variants with low (neutral), moderate (mild), and high (deleterious) impact in Downy Woodpecker and  
381 (b) Hairy Woodpecker. (c) Ratio of homozygous derived variants of high impact (deleterious) over  
382 homozygous derived variants of low impact (neutral) in each genetic cluster and species (recessive  
383 model). (d) Ratio of the total number of derived variants of high impact (deleterious) over total number of  
384 derived variants of low impact (neutral) in each genetic cluster and species (additive model). Horizontal  
385 bars denote population medians.  
386

387  
388 Lastly, we investigated the overall impact of natural selection on protein-coding sequences of  
389 Downy and Hairy Woodpecker. We calculated the ratio of synonymous over nonsynonymous substitutions  
390 (dN/dS) along the branches leading to Downy and Hairy Woodpecker using a set of 397 high-quality  
391 orthologous genes distributed throughout the genome. dN/dS ratio was higher in Downy Woodpecker  
392 (dN/dS = 0.065) than in Hairy Woodpecker (dN/dS = 0.053), suggesting that purifying selection might have  
393 been weaker in the Downy Woodpecker lineage over deeper evolutionary times (i.e.  $>4N_e$  generations ago  
394 [71–73]).  
395

## 396 Discussion

397 Our genomic analyses reveal that both Ice Age demographic fluctuations and linked selection played a  
398 significant role shaping patterns of diversity and differentiation across populations and along the genomes  
399 of Downy and Hairy Woodpecker. We found that genome-wide nucleotide diversity, as well as the  
400 landscape of recombination, are highly correlated between these two species, which diverged more than 8  
401 mya. Despite shared environmental pressures, this coupling suggests that intrinsic properties of the genome,  
402 such as recombination rate, might be conserved across deep evolutionary time. We posit that linked  
403 selection might underlie the genomic heterogeneity observed, as demonstrated by a significant association  
404 between nucleotide diversity, recombination rate, and gene density. Despite strong fluctuations in  $N_e$  over  
405 the Pleistocene, Downy and Hairy Woodpecker maintained large population sizes, which might have  
406 facilitated the action of natural selection. Nevertheless, given the large differences in long-term  $N_e$  observed  
407 among populations, our results indicate variation in the efficacy of selection.

408 *Conserved properties of the genome underlie the correlated genomic landscape of Hairy and Downy*  
409 *Woodpecker*

410 We recovered large heterogeneity in patterns of nucleotide diversity ( $\theta_\pi$ ) and  $F_{ST}$  along the genomes of  
411 Downy and Hairy Woodpecker. Despite this variation, our results revealed a highly correlated genomic  
412 landscape between the two species. Such covariation in levels of genome-wide measures of diversity and  
413 differentiation across distantly related species is common [34,35,74–77] and suggests that properties of the  
414 genome, such as mutation rate, recombination rate, and density of targets of selection are conserved across  
415 deep evolutionary time [78]. For example, bird genomes are known to show large karyotypic stability, with  
416 very few chromosomal rearrangements and high synteny across highly divergent species [79–82]. Features  
417 of the genome, such as recombination rates and GC content, might also be conserved across species. We  
418 found that estimates of recombination rate are highly correlated between Downy and Hairy Woodpecker,  
419 although higher in the latter. Linkage disequilibrium (LD), which is a function of both recombination rate  
420 and  $N_e$ , was extremely short in Downy and Hairy Woodpecker. Whereas linkage disequilibrium extends  
421 for over thousands of base pairs in humans [83,84], for instance, it breaks after only 100 bp in Downy and  
422 Hairy Woodpecker. Such properties have been observed in other bird species with very large  $N_e$  [85,86].  
423 We also found large variation in recombination rates both within and among chromosomes, with the Z  
424 chromosome showing the lowest rates. Considering the lack of recombination across much of the Z  
425 chromosome in female birds (heterogametic sex; ZW), at the population level, crossing-over occurs at a  
426 much lower rate in sex chromosomes than in their autosome counterparts [64,87,88]. Similar to Downy and  
427 Hairy Woodpecker, recombination in the chicken (*Gallus gallus*) was approximately 2.5 times lower in the

428 Z chromosome than in the autosomes [89,90]. As a consequence, many bird species show reduced diversity  
429 and faster divergence in the Z chromosome [64,85,91,92].

430 *The interplay between natural selection and recombination produces a heterogeneous genomic landscape*

431 One of the main mechanisms proposed to explain the substantial heterogeneity in levels of polymorphism  
432 along the genome is the effect of linked selection [21,23,24]. Both positive selection (i.e., in favor of a  
433 beneficial allele) and negative selection (i.e., against a deleterious allele) are expected to reduce diversity  
434 around functional elements [21,23]. Such a reduction is extended to all neighboring sites that happen to be  
435 linked to the target of selection (hitchhiking effect [21]). The extent to which adjacent sites are affected by  
436 linked selection is dependent on the recombination landscape, such that regions where recombination rate  
437 is lower tend to show lower genetic diversity and vice versa [32,93,94]. Similarly, the higher the density of  
438 functional elements (i.e., targets of selection), the more severe is the reduction in genetic diversity due to  
439 the effect of recurrent selection [33,38–40]. Although a correlation between nucleotide diversity and  
440 recombination may arise in the absence of linked selection, we do not expect that to be true for gene density,  
441 since directional selection unavoidably affects levels of polymorphism in regions presumed to be  
442 functional. Such correlations are therefore interpreted as evidence of the effect of selection on linked neutral  
443 sites and can be used to assess the magnitude of linked selection [24,95]. In light of these results, we  
444 identified strong evidence that linked selection has contributed to patterns of genetic diversity along the  
445 genomes of Downy and Hairy Woodpecker. First, nucleotide diversity ( $\theta_\pi$ ) was positively associated with  
446 recombination rates in both species. Second, there was a weak but highly significant association between  
447 nucleotide diversity ( $\theta_\pi$ ) and gene density. Third, as predicted by theory, the strength of association between  
448 nucleotide diversity ( $\theta_\pi$ ) and gene density varied according to the long-term  $N_e$ , such that larger populations  
449 showed more pronounced signatures of linked selection.

450 Natural selection is also expected to impact levels of genetic differentiation along the genome  
451 [35,96,97]. We estimated a weak but significant negative association between nucleotide diversity ( $\theta_\pi$ ) and  
452 the average pairwise  $F_{ST}$ , indicating that regions of the genome that are highly differentiated between  
453 populations tend to show reduced diversity. These correlations are consistent with the effect of linked  
454 selection continuously eroding diversity near targets of selection (especially in regions of low  
455 recombination), which leads to the inflation of local levels of population differentiation [96]. Because  
456 beneficial alleles are not expected to appear frequently, background selection against deleterious alleles is  
457 the most likely selective mechanism underlying the correlation between  $F_{ST}$ , nucleotide diversity, and  
458 recombination rate [97,98]. These findings suggest that population-specific selection associated with local  
459 adaptation (i.e., divergent selection) is not necessary to produce a correlated genomic landscape.  
460 Comparative analyses across both distantly and closely related bird species demonstrate that linked

461 selection can reduce genetic diversity prior to population splits and consequently produce parallel patterns  
462 of genetic differentiation in regions of low recombination [75,77,98,99].

463

464 *Dynamic population demography characterizes the evolution of Hairy and Downy Woodpecker in the*  
465 *Pleistocene*

466 We found that population structure was spatially congruent between Downy and Hairy Woodpecker, but  
467 that their demographic histories and extent of genetic structuring varied. Both species were characterized  
468 by phylogeographic clusters that are consistent with previous studies [12,48,49] and were concordant with  
469 structuring in glacial refugia, albeit forming during different time scales. The observation of common  
470 geographic patterns formed across different time periods highlights the predictability of the interaction of  
471 the physical landscape, drift, and gene flow on genetic diversity. Further evidence of the dramatic effects  
472 of Pleistocene climatic fluctuations on genetic diversity were the repeated cycles of population contraction  
473 and expansion. Yet, despite strong variation in  $N_e$  over the past 500 ky, our data indicates that Downy and  
474 Hairy Woodpecker have been resilient enough to maintain relatively large populations, which favored the  
475 maintenance of very high genetic diversity, even in the face of repeated bottlenecks. While non-equilibrium  
476 population dynamics are a hallmark of species that occur in previously glaciated areas [2], the relationship  
477 between the magnitude of Pleistocene population size reductions and the efficacy of selection under these  
478 conditions remain poorly explored in empirical systems.

479 Consistent with theoretical predictions, nucleotide diversity within populations was strongly  
480 correlated with the long-term  $N_e$ . Alaska showed the lowest genome-wide genetic diversity, likely as a  
481 consequence of being one of the latest areas to be deglaciated and most recently founded. On the other  
482 hand, the Northern Rockies exhibited the largest nucleotide diversity and long-term  $N_e$ , in both focal  
483 species. Data from multiple sources support the existence of a temporally fluctuating ice-free corridor along  
484 the Canadian Rocky Mountains that might have functioned as a glacial refugium [10,100–102]. Thus, it is  
485 possible that suitable habitat might have allowed rapid growth and persistence of large populations in the  
486 North Rockies during the glacial periods of the Pleistocene.

487 *The efficacy of linked selection was affected by different evolutionary trajectories of Downy and Hairy*  
488 *Woodpecker*

489 We investigated whether differences in the demographic trajectories of populations of Downy and Hairy  
490 Woodpecker in response to the Pleistocene glaciation had an impact on the efficacy of natural selection  
491 across the genome. Given that purifying selection is more efficient in larger populations [103], we  
492 hypothesized that populations that underwent a stronger bottleneck or maintained lower levels of  $N_e$  were

493 more likely to have accumulated highly deleterious mutations (i.e., genetic load [26–30]). We failed to find  
494 support for this prediction. In contrast to our expectations, we found that the Rocky Mountains, the genetic  
495 cluster with the largest long-term  $N_e$ , exhibited the largest genetic load in both species. One possible  
496 explanation for this finding is that highly deleterious alleles might have been more efficiently purged from  
497 populations that went through more severe bottlenecks due to higher inbreeding [67]. For example, species  
498 whose populations underwent extreme bottlenecks show fewer mutations of high impact because extensive  
499 inbreeding makes highly deleterious alleles more likely to be exposed in homozygosity [104–106]. This is  
500 not the case for Downy and Hairy Woodpecker, which despite repeated episodes of bottlenecks still  
501 managed to maintain considerably large population sizes, making inbreeding very unlikely to have  
502 occurred. Besides, we found that Alaska, the population with the lowest long-term  $N_e$ , does not carry the  
503 fewest highly deleterious alleles, as predicted by the “purging under inbreeding” scenario. Instead, it carries  
504 a larger load than the East and the Pacific Northwest, which are populations with a higher long-term  $N_e$ . At  
505 the species level, however, we found that genetic load was generally larger in Downy Woodpecker than  
506 Hairy Woodpecker, which is consistent with more efficient purifying selection in Hairy Woodpecker. This  
507 finding makes sense considering that Hairy Woodpecker exhibits slightly larger  $N_e$  than Downy  
508 Woodpecker. Supporting this observation, we also found a larger excess of highly deleterious mutations at  
509 low frequencies in Hairy Woodpecker, indicating that deleterious alleles were less likely to rise to high  
510 frequencies in Hairy Woodpecker than Downy Woodpecker likely due to more efficient selection. Lastly,  
511 we observed that the genome-wide ratio of non-synonymous over synonymous substitutions (dN/dS) was  
512 higher in Downy Woodpecker than Hairy Woodpecker. Elevated genome-wide, as opposed to gene-  
513 specific, dN/dS ratio is suggestive of a reduction in the efficacy of purifying selection [71,72]. This result  
514 indicates that a smaller  $N_e$  in the lineage leading to Downy Woodpecker might have allowed more fixation  
515 of slightly deleterious alleles.

516 In conclusion, we investigated the impact of demography and natural selection on the genomic  
517 landscape of two co-distributed woodpecker species whose population histories have been profoundly  
518 impacted by the Ice Age. We found that despite a dynamic demographic history, Downy and Hairy  
519 Woodpecker were able to maintain very large  $N_e$  even during glacial periods, which might have facilitated  
520 the action of natural selection. Supporting this conclusion, our results reveal a correlation between  
521 nucleotide diversity, recombination rate, and gene density, which suggests the effect of linked selection  
522 shaping the genomic landscape. In addition, we found that the magnitude of linked selection was associated  
523 with population-specific  $N_e$  trajectories, indicating that demography and natural selection operated in  
524 concert to shape patterns of polymorphism along the genome. This study adds to the growing body of  
525 literature supporting the role of natural selection in driving patterns of genome-wide variation but highlights

526 the difficulty of interpreting the outcome of the interplay between genetic drift and natural selection in  
527 organisms with non-equilibrium demographic dynamics and large effective population sizes.

## 528 **Material and Methods**

### 529 *Sample collection and whole genome sequencing*

530 We collected 70 samples for both the Downy Woodpecker (*D. pubescens*) and Hairy Woodpecker (*D.*  
531 *villosus*) in each of seven populations ( $n = 10$  per population) across their temperate North American ranges  
532 (Figure 1): New York (Northeast), Louisiana (Southeast), Minnesota (Midwest), New Mexico and  
533 Colorado (Southern Rockies), Wyoming (Northern Rockies), Washington (Pacific Northwest), and Alaska.  
534 The samples were obtained through museum loans of vouchered specimens and augmented by field  
535 collections in Wyoming, Louisiana, and Alaska (Table S1). We extracted genomic DNA from tissue  
536 samples using the MagAttract High Molecular Weight DNA Kit from Qiagen following manufacturer's  
537 instructions (Qiagen, California, USA). These samples were then submitted for whole genome resequencing  
538 on a paired-end Illumina HiSeq X Ten machine at RAPiD Genomics (Gainesville, Florida, USA).

### 539 *Read alignment, variant calling and filtering*

540 Raw reads were trimmed for Illumina adapters using Trimmomatic v0.36 [107] with the following  
541 parameters: "ILLUMINACLIP:TruSeq3-PE-2.fa:2:30:10:8:true", resulting in an average of 35,689,979  
542 paired reads per sample. Read quality was assessed with FastQC v0.11.4. [108]. Given the high synteny  
543 and evolutionary stasis of bird chromosomes [82], we produced a chromosome-length reference genome  
544 for Downy Woodpecker by ordering and orienting the scaffolds and contigs of the Downy Woodpecker  
545 genome assembly [52] along the 35 chromosomes of the Zebra finch (*Taeniopygia guttata*; version  
546 taeGut3.2.4) using Chromosome from the Satsuma package [109]. We verified the completeness of this  
547 new reference by searching for a set of single-copy avian orthologs using BUSCO v2.0.1 (Benchmarking  
548 Universal Single-Copy Orthologs [110]). A total of 91.1% of these genes were present and complete in our  
549 pseudo-chromosome reference, indicating sufficient completeness. We finally transferred the prediction-  
550 based genome annotation of the Downy Woodpecker [52] by mapping the genomic coordinates of each  
551 annotated feature against the pseudo-chromosome reference using gmap [111]. A total of 99.98% of all the  
552 14,443 annotated genes in Downy Woodpecker were successfully mapped to the pseudo-chromosome  
553 reference.

554 Trimmed reads for both Downy and Hairy Woodpecker were aligned against the pseudo-  
555 chromosome reference genome of the Downy Woodpecker using BWA v0.7.15 mem algorithm [112]. On  
556 average, 97.27% of reads from Downy Woodpecker and 96.38% of reads from Hairy woodpecker were

557 successfully mapped, demonstrating that despite the large evolutionary distance between these two species  
558 [47], sequence conservation allows efficient mapping. Resulting sequence alignment/map (SAM) files were  
559 converted to their binary format (BAM) and sequence group information was added. Next, reads were  
560 sorted, marked for duplicates, and indexed using Picard (<http://broadinstitute.github.io/picard/>). The  
561 Genome Analysis Toolkit (GATK v3.6 [113]) was then used to perform local realignment of reads near  
562 insertion and deletion (indels) polymorphisms. We first used the RealignerTargetCreator tool to identify  
563 regions where realignment was needed, then produced a new set of realigned binary sequence  
564 alignment/map (BAM) files using IndelRealigner. The final quality of mapping was assessed using  
565 QualiMap v.2.2.1 [114].

566 We implemented two complementary approaches for the downstream analysis of genetic  
567 polymorphism. First, we used ANGSD v0.917 [53], a method that accounts for the genotype uncertainty  
568 inherent to low depth sequencing data by inferring genotype likelihoods instead of relying on genotype  
569 calls. We estimated genotype likelihoods from BAM files using the GATK model (*-GL 2* [113]), retaining  
570 only sites present in at least 70% of sampled individuals (*-minInd 50*) and with the following filters: a  
571 minimum mapping quality of 30 (*-minMapQ 30*), a minimum quality score of 20 (*-minQ 20*), a minimum  
572 frequency of the minor allele of 5% (*-minMaf 0.05*), and a P-value threshold for the allele-frequency  
573 likelihood ratio test statistic of 0.01 (*-SNP\_pval 0.01*). Allele frequencies were estimated directly from  
574 genotype likelihoods assuming known major and minor alleles (*-doMajorMinor 1 -doMaf 1*). A total of  
575 16,736,465 and 15,463,356 SNPs were identified for Downy and Hairy Woodpecker, respectively. Because  
576 several downstream analyses lack support for genotype likelihoods, we also called genotypes using GATK  
577 v3.8.0 [115]. First, we run HaplotypeCaller separately for each sample using the *--emitRefConfidence*  
578 *GVCF -minPruning 1 -minDanglingBranchLength 1* options to create one gVCF per individual, then we  
579 ran GenotypeGVCFs with default settings across all samples to jointly call genotypes. In the absence of a  
580 training SNP panel for our non-model species, we applied hard filtering recommendations from the Broad  
581 Institute's Best Practices (<https://gatk.broadinstitute.org/>). We filtered SNPs with quality by depth below 2  
582 ( $QD < 2.0$ ), SNPs where reads with the alternative allele were shorter than those with the reference allele  
583 ( $ReadPosRankSum < -8$ ), SNPs with evidence of strand bias ( $FS > 60.0$  and  $SOR > 3.0$ ), SNPs with root  
584 mean square of the mapping quality below 40 ( $MQ < 40.0$ ), and SNPs in reads where the alternative allele  
585 had a lower mapping quality than the reference allele ( $MQRankSumTest < -12.5$ ). In addition, we used  
586 VCFtools v0.1.17 [116] to retain only biallelic SNPs occurring in at least 75% of samples, with a minimal  
587 mean coverage of 2x, a maximum mean coverage of 100x, and a P-value above 0.01 for the exact test for  
588 Hardy-Weinberg Equilibrium. We applied three different minor allele frequency (maf) thresholds – 0.05  
589 (for most analyses), 0.02 (for the estimation of recombination rates), and no threshold (for demographic  
590 analyses based on the SFS).



591 *Population structure*

592 To assess population structure, we performed a principal components analysis (PCA) using the R package  
593 SNPRelate v3.3 [117]. We first applied the function *snpGdsLDpruning* to select a subset of unlinked SNPs  
594 (LD  $r^2$  threshold = 0.2), with < 25% missing data and a  $maf > 0.05$ , which resulted in a total of 71,228 SNPs  
595 for Downy Woodpecker and 71,763 SNPs for Hairy Woodpecker. We then used the function *snpGdsPCA*  
596 to calculate the eigenvectors and eigenvalues for the principal component analysis. We investigated  
597 population structure by looking at the first three principal components (PC1–PC3). In addition, we used  
598 NGSadmix [54], implemented in ANGSD [53], to investigate the number of genetic clusters, and associated  
599 admixture proportions for each individual. NGSadmix is a maximum likelihood approach analogous to  
600 STRUCTURE [118], but bases its inferences on genotype likelihoods instead of SNP calls, therefore  
601 accounting for the uncertainty of genotypes.

602 We also described the relationships among populations by building a maximum likelihood tree  
603 based on the polymorphism-aware phylogenetic model (PoMo [58]) implemented in IQ-Tree 2 [59]. PoMo  
604 is a phylogenetic method that accounts for incomplete lineage sorting inherent to population-level data by  
605 incorporating polymorphic states into DNA substitution models. We used a python script  
606 (<https://github.com/pomo-dev/cflib>) to convert our vcf files containing only intergenic SNPs into the input  
607 format of PoMo (counts file). IQ-Tree was run using the HKY+P model of sequence evolution with 100  
608 non-parametric bootstraps to assess support. We used three samples from Hairy Woodpecker as an outgroup  
609 to root the tree for Downy Woodpecker, and vice versa.

610 We estimated pairwise  $F_{ST}$  values among populations in each species using ANGSD v0.917 [53].  
611 We first produced site-allele-frequency likelihoods using the command *-doSaf*, followed by the *realSFS -*  
612 *fold 1* command to generate a folded site frequency spectrum (SFS). We then estimated weighted  $F_{ST}$  values  
613 using the *realSFS fst* command both globally and across non-overlapping 100 kb windows.

614 We investigated patterns of gene flow across the landscape using the estimated effective migration  
615 surface (EEMS [55]), which is a method to visualize variation in patterns of gene flow across a habitat.  
616 Low values of relative effective migration rate ( $m$ ) indicate a rapid decay in genetic similarity in relation to  
617 geographic distances, which suggests the presence of barriers to gene flow. In contrast, high values of  $m$   
618 indicate larger genetic similarity than expected given the geographic distance, suggesting genetic  
619 connectivity. We generated pairwise identity-by-state (IBS) matrices using the *-doIBS* function in ANGSD  
620 [53] and used these matrices to represent dissimilarity between individuals. We ran EEMS using 200 demes  
621 and performed a single MCMC chain run with  $1 \times 10^7$  iterations following a burn-in of  $5 \times 10^6$ , and a  
622 thinning of 9,999. We then checked the posterior probabilities to ensure convergence.

623 *Demographic inference*

624 We inferred past changes in effective population size ( $N_e$ ) using Stairway Plot 2 [56], a method that  
625 leverages information contained in the site frequency spectrum (SFS) to estimate recent population history.  
626 Unlike methods based on the Sequentially Markov Coalescent (e.g, PSMC, SMC++), Stairway Plot 2 is  
627 applicable to a large sample of unphased whole genome sequences, and it is insensitive to read depth  
628 limitations. We estimated the folded site frequency spectrum for each population using the *realSFS* function  
629 in ANGSD [53]. For each population, we used the default 67% sites for training, and calculated median  
630 estimates and 95% pseudo-CI based on 200 replicates. We assumed a mutation rate of  $4.007 \times 10^{-9}$   
631 mutations per site per generation, as estimated from coding regions of the Northern Flicker's genome [57]  
632 and a generation time of one year for both species. We then utilized the estimates of  $N_e$  from Stairway Plot  
633 2 across the past 500 kya to calculate the harmonic mean on linear-stepped time points, representing each  
634 population's long-term  $N_e$ .

635 We further investigated the demographic history of the two species using *fastsimcoal2* v2.6.0.3, a  
636 composite likelihood method that uses the joint site frequency spectrum (jSFS) to perform model selection  
637 and estimate demographic parameters [62]. We tested the support for two competing demographic models:  
638 (i) a model where all populations diverge synchronously from a single large refugium and expand  
639 independently with asymmetric gene flow, and (ii) a bifurcating model where populations diverge at  
640 different times from multiple refugia and expand independently with asymmetric gene flow. Since we only  
641 need a reasonably large subset of the genome to get an accurate estimate of the site frequency spectrum  
642 [119], we generated the four-population folded jSFS from a set of high quality SNPs with no maf filtering  
643 (Downy: 6,030,759 SNPs; Hairy: 7,967,215 SNPs) present in chromosome 1 using *easySFS.py*  
644 (<https://github.com/isaacovercast/easySFS>). We projected the jSFS down to 20 chromosomes (i.e., 10  
645 diploid samples) per population to avoid issues associated with differences in sample size and missing data.  
646 To minimize the impact of selection, we only included sites in non-coding regions of the genome. All  
647 models followed the topology of the population tree obtained from IQ-Tree 2 and assumed a mutation rate  
648 of  $4.007 \times 10^{-9}$  mutations per site per generation. For each model, we conducted 75 iterations of the  
649 optimization procedure, each with 40 expectation conditional maximization cycles and 100,000  
650 genealogical simulations per cycle. We performed model selection using the run with the highest likelihood  
651 for each model. For each species, we chose the model with the largest relative Akaike information criterion  
652 ( $AIC_w$ ) as the best-fit model. We obtained 95% pseudo-CI for parameter estimates by performing 100  
653 parametric bootstrap estimates simulating jSFSs under the best model and re-estimating parameters using  
654 these simulated datasets.

655 *Genetic diversity, recombination rates, and linkage disequilibrium*

656 We compared genetic diversity among populations of the two species by estimating the genome-wide  
657 pairwise nucleotide diversity  $\theta_\pi$  and the Watterson estimator of the rescaled mutation rate per base  $\theta_w$  using  
658 ANGSD [53]. We first ran the command `-doSaf 1 -minMapQ 30 -minQ 20` in ANGSD to generate site-  
659 allele-frequency likelihoods based on the GATK model [115], then we used `-realSFS` with the option `-fold`  
660 `1` to estimate the folded SFS. ANGSD was also used to estimate genome-wide Tajima's D. We estimated  
661 recombination rates ( $r$  = recombination rate per base pair per generation) along the genome of the two  
662 species using ReLERNN, a deep learning algorithm [63]. ReLERNN takes as input a vcf file and simulates  
663 training, validation, and test datasets matching the empirical distribution of  $\theta_w$ . ReLERNN then uses the  
664 raw genotype matrix and a vector of genomic coordinates to train a model that directly predicts per-base  
665 recombination rates (as opposed to a population-scaled recombination rate) across sliding windows [63].  
666 To reduce the impact of population structure on estimates, we restricted the prediction of recombination  
667 rates to the Eastern populations (Northeast + Southeast + Midwest), the genetic cluster with most samples.  
668 Given the conserved landscape of recombination in birds, we do not expect major differences in  
669 recombination across populations [82]. We used the SNP dataset with  $\text{maf} > 0.02$  and ran the analysis with  
670 default settings. Because ReLERNN is robust to demographic model misspecification [63], we simulated  
671 an equilibrium model considering a mutation rate of  $4.007 \times 10^{-9}$  mutations per generation [57] and  
672 assuming a generation time of one year. Finally, we explored the recombination history of each population  
673 by analyzing their patterns of linkage disequilibrium (LD) decay using PopLDdecay [120]. We calculated  
674 pairwise  $D'/r^2$  using the default maximum distance between SNPs of 300 kb and plotted it as a function of  
675 genomic distance (in kb).

#### 676 *Genomic predictors of regional variation in nucleotide diversity*

677 To investigate the factors shaping the genomic landscape of diversity in the two woodpecker species, we  
678 tested the effect of (i) recombination rate, (ii) gene density, and (iii) GC content on regional patterns of  
679 nucleotide diversity. We computed pairwise nucleotide diversity ( $\theta_\pi$ ) across 100 kb non-overlapping  
680 windows using ANGSD [53]. We first used the `-doThetas` function to estimate the site-specific nucleotide  
681 diversity from the posterior probability of allele frequency (SAF) using the estimated site frequency  
682 spectrum (SFS) as a prior. Then, we ran the `thetaStat do_stat` command to perform the sliding windows  
683 analysis. To quantify variation in recombination rates, we calculated weighted averages of recombination  
684 rates estimated in ReLERNN across 100 kb non-overlapping windows. We assessed gene density (i.e.,  
685 density of targets of selection) as the proportion of coding sequence (in number of base-pairs) for any given  
686 100 kb non-overlapping window and estimated GC content in each 100 kb non-overlapping window using  
687 the function `GC` of the R package `seqinr` version 3.6-1 [121]. We fit a general linear regression in R to  
688 assess the relationship between nucleotide diversity ( $\theta_\pi$ ) and the three predictor variables – recombination

689 rate, gene density, and base composition. We also fit a LOESS model to account for the potential non-  
690 linearity of these relationships using the R package *caret* [122]. Models were trained using cross-validation  
691 of 80% of the total data. To control for the collinearity among these variables, we also ran a principal  
692 component regression (PCR). PCR is a technique that summarizes the predictor variables into orthogonal  
693 components (PCs) before performing regression, therefore removing the correlation among variables. PCR  
694 was conducted using the R package *pls* [123]. All variables were Z-transformed before these analyses.

695 We also investigated the association between patterns of intraspecific population differentiation  
696 ( $F_{ST}$ ) and intrinsic properties of the genome (i.e., nucleotide diversity and recombination rates). To  
697 summarize the genomic landscape of differentiation into a single response variable we employed two  
698 approaches: for each 100 kb windows, we (i) calculated the average  $F_{ST}$  across all pairwise population  
699 comparisons; (ii) we performed a principal component analysis and extracted that first principal component  
700 (PC1) that explained the greatest covariance among all pairwise population comparisons.

#### 701 *Natural selection and genetic load*

702 To estimate the genetic load of each species and populations, we first used the software *snpEff* v4.1 [124]  
703 to classify SNPs into one of four categories of functional impact, according to the predicted effect of the  
704 gene annotation – (i) modifiers: variants in non-coding regions of the genome (e.g, introns, intergenic)  
705 whose effects are hard to predict; (ii) low: variants in coding sequences that cause no change in amino acid  
706 (i.e., synonymous); (iii) moderate: variants in coding sequences that cause a change in amino acid (i.e.,  
707 nonsynonymous); and (iv) high: variants in coding sequences that cause gain or loss of start and stop codon.  
708 We then selected a subset of 12 individuals with the lowest percentage of missing data (therefore,  
709 maximizing the total number of sites) in each species to polarize our SNPs. To do so, we looked for biallelic  
710 SNPs in Downy Woodpecker for which one of the alleles were fixed in Hairy Woodpecker and vice versa.  
711 The allele fixed in the outgroup was assumed to be the ancestral state. This is a sensitive step in the  
712 estimation of genetic load, so we only kept SNPs for which the ancestral state could be determined  
713 unambiguously [70]. We ended up with a total set of 363,903 polarized SNPs across the genome.

714 We characterized the site frequency spectrum (SFS) for each type of variant (according to the  
715 impact inferred from *snpEff*) by estimating the total frequency of each derived allele and calculating the  
716 proportion of each allele frequency bin. As a proxy for genetic load, for each individual, we estimated the  
717 ratio of the number of derived alleles of high impact (i.e., loss of function) in homozygosity over the number  
718 of derived alleles of low impact (i.e, synonymous) in homozygosity. This metric assumes a recessive model,  
719 in which derived alleles are only deleterious when in a homozygous state. We therefore also considered an  
720 additive model (i.e, semi-dominant) that assumes that derived alleles have deleterious effects in both

721 homozygosity and heterozygosity. For this metric, we counted the total number of derived alleles, instead  
722 of only the ones in homozygosity [70].

723 To look at selection over a deeper evolutionary scale, we estimated dN/dS, the ratio of  
724 nonsynonymous over synonymous substitution, using a set of 397 genes that were orthologous across  
725 Downy Woodpecker, Hairy Woodpecker and two avian outgroups – Chicken (*Gallus gallus*) and Zebra  
726 Finch (*Taeniopygia guttata*). We identified orthologous genes across all four species using the software  
727 JustOrthlogs [125] and only kept well-aligned loci. We first downloaded Ensembl genome assemblies and  
728 gene annotations for version *GRCg6a* and *bTaeGut1\_v1.p* of the Chicken and Zebra Finch genome,  
729 respectively (Ensembl v103). We then extracted coding sequences (CDS) for all identified orthologs from  
730 their respective reference genomes using a GFF3 parser included in JustOrthlogs and aligned them with  
731 the frameshift-aware MACSE software [126]. We used the parameter setting `--min_percent_NT_at_ends`  
732 `0.3` and `-codonForInternalStop NNN` for aligning and exporting sequences. The resulting amino-acid  
733 alignments were inspected with HMMcleaner to mask sites that were likely misaligned. We finally used  
734 *codeml* to estimate the overall dN/dS ratio along each branch of the tree assuming a one-ratio branch model  
735 in PAML [127].

736

### 737 **Acknowledgments**

738 We thank the following individuals and institutions for providing tissue samples and specimen loans for  
739 this study: A. G. Navarro Sigüenza (Museo de Zoología; UNAM), J. Klicka/S. Birk/R. Faucett (University  
740 of Washington Burke Museum), C. M. Milensky (Smithsonian Institution), C. Dardia (Cornell University  
741 Museum of Vertebrates), G. Spellman/A. Doll (Denver Museum of Nature & Science), B. Marks/S.  
742 Hackett/J. Bates (Field Museum of Natural History), F. Sheldon/D. Dittmann (LSU Museum of Natural  
743 Science), K. Barker/T. Imfeld (Midwest Museum of Natural History), C. Witt/A. Johnson/M. Anderson  
744 (Museum of Southwestern Biology). This work would not be possible without the assistance of Lucas  
745 DeCicco, Matt Brady, and Paul Sweet, who were very generous to help collect samples in the field. We  
746 thank Kaiya Provost, Jon Merwin, Vivien Chua, Glenn Seehofer, Gregory Thom, Elkin Tenorio, William  
747 Mauck, Lukas Musher, Laís Coelho, Amanda Rocha, Bruno Almeida, Isaac Overcast, Joel Cracraft, Frank  
748 Burbrink, Molly Przeworski, Deren Eaton, and Don Melnick for their invaluable input during the  
749 development and writing of this manuscript.

750 **Funding:** This study was funded by the Department of Ecology, Evolution, and Environmental Biology  
751 (E3B) at Columbia University, Conselho Nacional de Desenvolvimento Científico e Tecnológico (CNPq;  
752 grant no. 211496/2014-6), the Frank M. Chapman Memorial Fund and Linda J. Gormezano Memorial Fund  
753 from the American Museum of Natural History (AMNH), the American Ornithological Society Hesse

754 Award, the Society of Systematic Biologists Graduate Student Research Award, and a US National Science  
755 Award to BTS (DEB-1655736).

756 **Author contributions:** This study was conceived and designed by L.R.M. and B.T.S. A subset of samples  
757 was collected and made available by J.K. L.R.M. conducted all wet lab, bioinformatic analyses, and drafted  
758 the paper with input from all authors.

759 **Competing interests:** The authors declare that they have no competing interests.

760 **Data and materials availability:** Whole-genome resequencing data are available at the Sequence Read  
761 Archive (<https://ncbi.nlm.nih.gov/sra>) under accession numbers #. All data needed to evaluate the  
762 conclusions in the paper are present in the paper and/or the Supplementary Materials. Code used in this  
763 study is available at <https://github.com/lucasrocmoreira/Moreira-et-al-2022>. Additional data related to this  
764 paper may be requested from the authors.

## 765 **References**

- 766 1. Hewitt G. The genetic legacy of the Quaternary ice ages. *Nature*. 2000;405: 907–913.
- 767 2. Hewitt GM. Genetic consequences of climatic oscillations in the Quaternary. Willis KJ, Bennett KD,  
768 Walker D, editors. *Philos Trans R Soc Lond B Biol Sci*. 2004;359: 183–195.
- 769 3. Nadachowska-Brzyska K, Li C, Smeds L, Zhang G, Ellegren H. Temporal dynamics of avian  
770 populations during Pleistocene revealed by whole-genome sequences. *Curr Biol*. 2015;25: 1375–  
771 1380.
- 772 4. Lessa EP, Cook JA, Patton JL. Genetic footprints of demographic expansion in North America, but  
773 not Amazonia, during the Late Quaternary. *Proceedings of the National Academy of Sciences*.  
774 2003;100: 10331–10334.
- 775 5. Burbrink F, Chan YL, Myers EA, Ruane S, Smith BT, Hickerson MJ. Asynchronous demographic  
776 responses to Pleistocene climate change in Eastern Nearctic vertebrates. Sgro C, editor. *Ecol Lett*.  
777 2016;19: 1457–1467.
- 778 6. Knowles LL. Did the Pleistocene glaciations promote divergence? Tests of explicit refugial models  
779 in montane grasshoppers. *Mol Ecol*. 2001;10: 691–701.
- 780 7. Zink RM. The role of subspecies in obscuring avian biological diversity and misleading conservation  
781 policy. *Proceedings of the Royal Society B: Biological Sciences*. 2004;271: 561–564.
- 782 8. Anderson LL, Hu FS, Nelson DM, Petit RJ, Paige KN. Ice-age endurance: DNA evidence of a white  
783 spruce refugium in Alaska. *Proceedings of the National Academy of Sciences*. 2006;103: 12447–  
784 12450.
- 785 9. Waltari E, Hijmans RJ, Peterson AT, Nyári ÁS, Perkins SL, Guralnick RP. Locating Pleistocene  
786 refugia: comparing phylogeographic and ecological niche model predictions. Chave J, editor. *PLoS*

- 787 One. 2007;2: e563.
- 788 10. Shafer ABA, Cullingham CI, Côté SD, Coltman DW. Of glaciers and refugia: A decade of study  
789 sheds new light on the phylogeography of northwestern North America. *Mol Ecol.* 2010;19: 4589–  
790 4621.
- 791 11. Campbell-Staton SC, Goodman RM, Backström N, Edwards SV, Losos JB, Kolbe JJ. Out of Florida:  
792 mtDNA reveals patterns of migration and Pleistocene range expansion of the Green Anole lizard  
793 (*Anolis carolinensis*). *Ecol Evol.* 2012;2: 2274–2284.
- 794 12. Pulgarín-R PC, Burg TM. Genetic signals of demographic expansion in Downy Woodpecker  
795 (*Picoides pubescens*) after the Last North American Glacial Maximum. Johnson N, editor. *PLoS*  
796 *One.* 2012;7: e40412.
- 797 13. Reid BN, Kass JM, Wollney S, Jensen EL, Russello MA, Viola EM, et al. Disentangling the genetic  
798 effects of refugial isolation and range expansion in a trans-continently distributed species. *Heredity*  
799 . 2018. doi:10.1038/s41437-018-0135-5
- 800 14. Davis MB. Range shifts and adaptive responses to Quaternary climate change. *Science.* 2001;292:  
801 673–679.
- 802 15. Gossmann TI, Shanmugasundram A, Börno S, Duvaux L, Lemaire C, Kuhl H, et al. Ice-Age Climate  
803 Adaptations Trap the Alpine Marmot in a State of Low Genetic Diversity. *Curr Biol.* 2019;29: 1712–  
804 1720.e7.
- 805 16. Li J, Li H, Jakobsson M, Li S, Sjödin P, Lascoux M. Joint analysis of demography and selection in  
806 population genetics: Where do we stand and where could we go? *Mol Ecol.* 2012;21: 28–44.
- 807 17. Kern AD, Hahn MW. The Neutral Theory in Light of Natural Selection. Kumar S, editor. *Mol Biol*  
808 *Evol.* 2018;35: 1366–1371.
- 809 18. Jensen JD, Payseur BA, Stephan W, Aquadro CF, Lynch M, Charlesworth D, et al. The importance  
810 of the Neutral Theory in 1968 and 50 years on: A response to Kern and Hahn 2018. *Evolution.*  
811 2019;73: 111–114.
- 812 19. Kimura M, Crow JF. The number of alleles that can be maintained in a finite population. *Genetics.*  
813 1964;49: 725–738.
- 814 20. Kimura M. *The Neutral Theory of Molecular Evolution.* Cambridge University Press; 1983.
- 815 21. Maynard J, Haigh J. The hitch-hiking effect of a favourable gene. *Genet Res.* 2007;89: 391–403.
- 816 22. Cutter AD, Choi JY. Natural selection shapes nucleotide polymorphism across the genome of the  
817 nematode *Caenorhabditis briggsae*. *Genome Res.* 2010;20: 1103–1111.
- 818 23. Charlesworth B, Morgan MT, Charlesworth D. The effect of deleterious mutations on neutral  
819 molecular variation. *Genetics.* 1993;134: 1289–1303.
- 820 24. Cutter AD, Payseur BA. Genomic signatures of selection at linked sites: unifying the disparity  
821 among species. *Nat Rev Genet.* 2013;14: 262–274.
- 822 25. Comeron JM. Background Selection as Baseline for Nucleotide Variation across the *Drosophila*  
823 Genome. Begun DJ, editor. *PLoS Genet.* 2014;10: e1004434.

- 824 26. Henn BM, Botigué LR, Peischl S, Dupanloup I, Lipatov M, Maples BK, et al. Distance from sub-  
825 Saharan Africa predicts mutational load in diverse human genomes. *Proc Natl Acad Sci U S A*.  
826 2016;113: E440–9.
- 827 27. Willi Y, Fracassetti M, Zoller S, Van Buskirk J. Accumulation of Mutational Load at the Edges of a  
828 Species Range. *Mol Biol Evol*. 2018;35: 781–791.
- 829 28. Wang XJ, Hu QJ, Guo XY, Wang K, Ru DF, German DA, et al. Demographic expansion and genetic  
830 load of the halophyte model plant *Eutrema salsugineum*. *Mol Ecol*. 2018;27: 2943–2955.
- 831 29. Rougemont Q, Moore J-S, Leroy T, Normandeau E, Rondeau EB, Withler RE, et al. Demographic  
832 history shaped geographical patterns of deleterious mutation load in a broadly distributed Pacific  
833 Salmon. Buerkle A, editor. *PLoS Genet*. 2020;16: e1008348.
- 834 30. de Pedro M, Riba M, González-Martínez SC, Seoane P, Bautista R, Claros MG, et al. Demography,  
835 genetic diversity and expansion load in the colonizing species *Leontodon longirostris* (Asteraceae)  
836 throughout its native range. *Mol Ecol*. 2021; mec.15802.
- 837 31. Mattila TM, Laenen B, Horvath R, Hämälä T, Savolainen O, Slotte T. Impact of demography on  
838 linked selection in two outcrossing Brassicaceae species. *Ecol Evol*. 2019;9: 9532–9545.
- 839 32. Begun DJ, Aquadro CF. Levels of naturally occurring DNA polymorphism correlate with  
840 recombination rates in *D. melanogaster*. *Nature*. 1992;356: 519–520.
- 841 33. Gossman TI, Woolfit M, Eyre-Walker A. Quantifying the Variation in the Effective Population  
842 Size Within a Genome. *Genetics*. 2011;189: 1389–1402.
- 843 34. Dutoit L, Vijay N, Mugal CF, Bossu CM, Burri R, Wolf J, et al. Covariation in levels of nucleotide  
844 diversity in homologous regions of the avian genome long after completion of lineage sorting.  
845 *Proceedings of the Royal Society B: Biological Sciences*. 2017;284. doi:10.1098/rspb.2016.2756
- 846 35. Stankowski S, Chase MA, Fuiten AM, Rodrigues MF, Ralph PL, Streisfeld MA. Widespread  
847 selection and gene flow shape the genomic landscape during a radiation of monkeyflowers. Jiggins  
848 CD, editor. *PLoS Biol*. 2019;17: e3000391.
- 849 36. Wang J, Street NR, Park E, Liu J, Ingvarsson PK. Evidence for widespread selection in shaping the  
850 genomic landscape during speciation of *Populus*. *Mol Ecol*. 2020;29: 1120–1136.
- 851 37. Talla V, Soler L, Kawakami T, Dincă V, Vila R, Friberg M, et al. Dissecting the Effects of Selection  
852 and Mutation on Genetic Diversity in Three Wood White (Leptidea) Butterfly Species. Gonzalez J,  
853 editor. *Genome Biol Evol*. 2019;11: 2875–2886.
- 854 38. Andolfatto P. Hitchhiking effects of recurrent beneficial amino acid substitutions in the *Drosophila*  
855 *melanogaster* genome. *Genome Res*. 2007;17: 1755–1762.
- 856 39. Branca A, Paape TD, Zhou P, Briskine R, Farmer AD, Mudge J, et al. Whole-genome nucleotide  
857 diversity, recombination, and linkage disequilibrium in the model legume *Medicago truncatula*.  
858 *Proceedings of the National Academy of Sciences*. 2011;108: E864–E870.
- 859 40. Beissinger TM, Wang L, Crosby K, Durvasula A, Hufford MB, Ross-Ibarra J. Recent demography  
860 drives changes in linked selection across the maize genome. *Nat Plants*. 2016;2: 16084.
- 861 41. Jensen-Seaman MI. Comparative Recombination Rates in the Rat, Mouse, and Human Genomes.



- 862 Genome Res. 2004;14: 528–538.
- 863 42. Smukowski CS, Noor MAF. Recombination rate variation in closely related species. *Heredity*.  
864 2011;107: 496–508.
- 865 43. Kawakami T, Smeds L, Backström N, Husby A, Qvarnström A, Mugal CF, et al. A high-density  
866 linkage map enables a second-generation collared flycatcher genome assembly and reveals the  
867 patterns of avian recombination rate variation and chromosomal evolution. *Mol Ecol*. 2014;23:  
868 4035–4058.
- 869 44. Schield DR, Pasquesi GIM, Perry BW, Adams RH, Nikolakis ZL, Westfall AK, et al. Snake  
870 recombination landscapes are concentrated in functional regions despite PRDM9. *Mol Biol Evol*.  
871 2020;37: 1272–1294.
- 872 45. Ouellet HR. *Biosystematics and ecology of Picoides villosus (L.) and P. pubescens (L.) (Aves*  
873 *Picidae)*. McGill University. 1977.
- 874 46. Weibel AC, Moore WS. Plumage convergence in *Picoides* woodpeckers based on a molecular  
875 phylogeny, with emphasis on convergence in Downy and Hairy woodpeckers. *Condor*. 2005;107:  
876 797–809.
- 877 47. Dufort MJ. An augmented supermatrix phylogeny of the avian family Picidae reveals uncertainty  
878 deep in the family tree. *Mol Phylogenet Evol*. 2016;94: 313–326.
- 879 48. Klicka J, Spellman GM, Winker K, Chua V, Smith BT. A phylogeographic and population genetic  
880 analysis of a widespread, sedentary North American bird: The Hairy Woodpecker (*Picoides*  
881 *villosus*). *Auk*. 2011;128: 346–362.
- 882 49. Graham BA, Burg TM. Molecular markers provide insights into contemporary and historic gene  
883 flow for a non-migratory species. *J Avian Biol*. 2012;43: 198–214.
- 884 50. Avise J. Mitochondrial DNA Phylogeographic Differentiation among Avian Populations and the  
885 Evolutionary Significance of Subspecies. *Auk*. 1992;109: 626–636.
- 886 51. Smith BT, Gehara M, Harvey MG. The demography of extinction in eastern North American birds.  
887 *Proceedings of the Royal Society B: Biological Sciences*. 2021;288: 20201945.
- 888 52. Jarvis ED, Mirarab S, Aberer AJ, Li BB, Houde P, Li C, et al. Whole-genome analyses resolve early  
889 branches in the tree of life of modern birds. *Science*. 2014;346: 1320–1331.
- 890 53. Korneliussen TS, Albrechtsen A, Nielsen R. ANGSD: Analysis of Next Generation Sequencing  
891 Data. *BMC Bioinformatics*. 2014;15: 356.
- 892 54. Skotte L, Korneliussen TS, Albrechtsen A. Estimating individual admixture proportions from next  
893 generation sequencing data. *Genetics*. 2013;195: 693–702.
- 894 55. Petkova D, Novembre J, Stephens M. Visualizing spatial population structure with estimated  
895 effective migration surfaces. *Nat Genet*. 2016;48: 94–100.
- 896 56. Liu X, Fu Y-X. Stairway Plot 2: demographic history inference with folded SNP frequency spectra.  
897 *Genome Biol*. 2020;21: 280.
- 898 57. Hruska JP, Manthey JD. De novo assembly of a chromosome-scale reference genome for the

- 899 northern flicker *Colaptes auratus*. G3 . 2021;11. doi:10.1093/g3journal/jkaa026
- 900 58. Schrempf D, Minh BQ, De Maio N, von Haeseler A, Kosiol C. Reversible polymorphism-aware  
901 phylogenetic models and their application to tree inference. *J Theor Biol.* 2016;407: 362–370.
- 902 59. Minh BQ, Schmidt HA, Chernomor O, Schrempf D, Woodhams MD, von Haeseler A, et al. IQ-  
903 TREE 2: New Models and Efficient Methods for Phylogenetic Inference in the Genomic Era. *Mol*  
904 *Biol Evol.* 2020;37: 1530–1534.
- 905 60. Pruett CL, Winker K. Evidence for cryptic northern refugia among high- and temperate-latitude  
906 species in Beringia. *Clim Change.* 2008;86: 23–27.
- 907 61. Brubaker LB, Anderson PM, Edwards ME, Lozhkin AV. Beringia as a glacial refugium for boreal  
908 trees and shrubs: new perspectives from mapped pollen data. *J Biogeogr.* 2005;32: 833–848.
- 909 62. Excoffier L, Foll M. fastsimcoal: a continuous-time coalescent simulator of genomic diversity under  
910 arbitrarily complex evolutionary scenarios. *Bioinformatics.* 2011;27: 1332–1334.
- 911 63. Adrion JR, Galloway JG, Kern AD. Predicting the landscape of recombination using deep learning.  
912 Wilke C, editor. *Mol Biol Evol.* 2020; 1–27.
- 913 64. Sundström H, Webster MT, Ellegren H. Reduced Variation on the Chicken Z Chromosome.  
914 *Genetics.* 2004. pp. 377–385. doi:10.1534/genetics.167.1.377
- 915 65. Xu L, Wa Sin SY, Grayson P, Edwards SV, Sackton TB. Evolutionary Dynamics of Sex  
916 Chromosomes of Paleognathous Birds. *Genome Biol Evol.* 2019;11: 2376–2390.
- 917 66. Zhou Q, Zhang J, Bachtrog D, An N, Huang Q, Jarvis ED, et al. Complex evolutionary trajectories  
918 of sex chromosomes across bird taxa. *Science.* 2014;346: 1246338–1246338.
- 919 67. Kirkpatrick M, Jarne P. The Effects of a Bottleneck on Inbreeding Depression and the Genetic Load.  
920 *Am Nat.* 2000;155: 154–167.
- 921 68. Charlesworth B. Fundamental concepts in genetics: effective population size and patterns of  
922 molecular evolution and variation. *Nat Rev Genet.* 2009;10: 195–205.
- 923 69. Simons YB, Turchin MC, Pritchard JK, Sella G. The deleterious mutation load is insensitive to  
924 recent population history. *Nat Genet.* 2014;46: 220–224.
- 925 70. Simons YB, Sella G. The impact of recent population history on the deleterious mutation load in  
926 humans and close evolutionary relatives. *Curr Opin Genet Dev.* 2016;41: 150–158.
- 927 71. Elyashiv E, Bullaughey K, Sattath S, Rinott Y, Przeworski M, Sella G. Shifts in the intensity of  
928 purifying selection: An analysis of genome-wide polymorphism data from two closely related yeast  
929 species. *Genome Res.* 2010;20: 1558–1573.
- 930 72. Figuet E, Nabholz B, Bonneau M, Mas Carrio E, Nadachowska-Brzyska K, Ellegren H, et al. Life  
931 History Traits, Protein Evolution, and the Nearly Neutral Theory in Amniotes. *Mol Biol Evol.*  
932 2016;33: 1517–1527.
- 933 73. Herrera-Álvarez S, Karlsson E, Ryder OA, Lindblad-Toh K, Crawford AJ. How to Make a Rodent  
934 Giant: Genomic Basis and Tradeoffs of Gigantism in the Capybara, the World’s Largest Rodent.  
935 Rogers R, editor. *Mol Biol Evol.* 2020. doi:10.1093/molbev/msaa285

- 936 74. Renaut S, Grassa CJ, Yeaman S, Moyers BT, Lai Z, Kane NC, et al. Genomic islands of divergence  
937 are not affected by geography of speciation in sunflowers. *Nat Commun.* 2013;4: 1827.
- 938 75. Burri R, Nater A, Kawakami T, Mugal CF, Olason PI, Smeds L, et al. Linked selection and  
939 recombination rate variation drive the evolution of the genomic landscape of differentiation across  
940 the speciation continuum of *Ficedula* flycatchers. *Genome Res.* 2015;25: 1656–1665.
- 941 76. Van Doren BM, Campagna L, Helm B, Illera JC, Lovette IJ, Liedvogel M. Correlated patterns of  
942 genetic diversity and differentiation across an avian family. *Mol Ecol.* 2017;26: 3982–3997.
- 943 77. Delmore KE, Lugo Ramos JS, Van Doren BM, Lundberg M, Bensch S, Irwin DE, et al. Comparative  
944 analysis examining patterns of genomic differentiation across multiple episodes of population  
945 divergence in birds. *Evolution Letters.* 2018;2: 76–87.
- 946 78. Dutoit L, Burri R, Nater A, Mugal CF, Ellegren H. Genomic distribution and estimation of  
947 nucleotide diversity in natural populations: perspectives from the collared flycatcher (*Ficedula*  
948 *albicollis*) genome. *Mol Ecol Resour.* 2017;17: 586–597.
- 949 79. Ellegren H. Evolutionary stasis: the stable chromosomes of birds. *Trends Ecol Evol.* 2010;25: 283–  
950 291.
- 951 80. Volker M, Backstrom N, Skinner BM, Langley EJ, Bunzey SK, Ellegren H, et al. Copy number  
952 variation, chromosome rearrangement, and their association with recombination during avian  
953 evolution. *Genome Res.* 2010;20: 503–511.
- 954 81. Ellegren H. The evolutionary genomics of birds. *Annu Rev Ecol Evol Syst.* 2013;44: 239–259.
- 955 82. Singhal S, Leffler EM, Sannareddy K, Turner I, Venn O, Hooper DM, et al. Stable recombination  
956 hotspots in birds. *Science.* 2015;350: 928–932.
- 957 83. Reich DE, Cargill M, Bolk S, Ireland J, Sabeti PC, Richter DJ, et al. Linkage disequilibrium in the  
958 human genome. *Nature.* 2001;411: 199–204.
- 959 84. Ardlie KG, Kruglyak L, Seielstad M. Patterns of linkage disequilibrium in the human genome. *Nat*  
960 *Rev Genet.* 2002;3: 299–309.
- 961 85. Balakrishnan CN, Edwards SV. Nucleotide variation, linkage disequilibrium and founder-facilitated  
962 speciation in wild populations of the zebra finch (*Taeniopygia guttata*). *Genetics.* 2009;181: 645–  
963 660.
- 964 86. Kardos M, Husby A, McFarlane SE, Qvarnström A, Ellegren H. Whole-genome resequencing of  
965 extreme phenotypes in collared flycatchers highlights the difficulty of detecting quantitative trait loci  
966 in natural populations. *Mol Ecol Resour.* 2016;16: 727–741.
- 967 87. Wilson Sayres MA. Genetic diversity on the sex chromosomes. *Genome Biol Evol.* 2018;10: 1064–  
968 1078.
- 969 88. Irwin DE. Sex chromosomes and speciation in birds and other ZW systems. *Mol Ecol.* 2018;27:  
970 3831–3851.
- 971 89. Levin I, Crittenden LB, Dodgson JB. Genetic Map of the Chicken Z Chromosome Using Random  
972 Amplified Polymorphic DNA (RAPD) Markers. *Genomics.* 1993;16: 224–230.

- 973 90. Schmid M, Nanda I, Guttenbach M, Steinlein C, Hoehn M, Scharl M, et al. First report on chicken  
974 genes and chromosomes 2000. *Cytogenet Genome Res.* 2000;90: 169–218.
- 975 91. Borge T, Webster MT, Andersson G, Saetre G-P. Contrasting Patterns of Polymorphism and  
976 Divergence on the Z Chromosome and Autosomes in Two *Ficedula* Flycatcher Species. *Genetics.*  
977 2005;171: 1861–1873.
- 978 92. Mank JE, Axelsson E, Ellegren H. Fast-X on the Z: rapid evolution of sex-linked genes in birds.  
979 *Genome Res.* 2007;17: 618–624.
- 980 93. Mugal CF, Nabholz B, Ellegren H. Genome-wide analysis in chicken reveals that local levels of  
981 genetic diversity are mainly governed by the rate of recombination. *BMC Genomics.* 2013;14: 86.
- 982 94. Wang J, Street NR, Scofield DG, Ingvarsson PK. Natural selection and recombination rate variation  
983 shape nucleotide polymorphism across the genomes of three related populus species. *Genetics.*  
984 2016;202: 1185–1200.
- 985 95. Corbett-Detig RB, Hartl DL, Sackton TB. Natural selection constrains neutral diversity across a wide  
986 range of species. Barton NH, editor. *PLoS Biol.* 2015;13: e1002112.
- 987 96. Cruickshank TE, Hahn MW. Reanalysis suggests that genomic islands of speciation are due to  
988 reduced diversity, not reduced gene flow. *Mol Ecol.* 2014;23: 3133–3157.
- 989 97. Matthey-Doret R, Whitlock MC. Background selection and  $F_{ST}$  : Consequences for detecting local  
990 adaptation. *Mol Ecol.* 2019;28: 3902–3914.
- 991 98. Vijay N, Weissensteiner M, Burri R, Kawakami T, Ellegren H, Wolf JBW. Genomewide patterns of  
992 variation in genetic diversity are shared among populations, species and higher-order taxa. *Mol Ecol.*  
993 2017;26: 4284–4295.
- 994 99. Irwin DE, Alcaide M, Delmore KE, Irwin JH, Owens GL. Recurrent selection explains parallel  
995 evolution of genomic regions of high relative but low absolute differentiation in a ring species. *Mol*  
996 *Ecol.* 2016;25: 4488–4507.
- 997 100. Jackson LE Jr. New evidence for the existence of an icefree corridor in the Rocky Mountain  
998 foothills near Calgary, Alberta, during Late Wisconsinan time. *Anat Physiol.* 1979; 107–111.
- 999 101. Rutter NW. Pleistocene history of the western Canadian ice-free corridor. *Quaternary stratigraphy*  
1000 *of Canada: a Canadian contribution to the IGCP Project.* 1984;24: 49–56.
- 1001 102. Pedersen MW, Ruter A, Schweger C, Friebe H, Staff RA, Kjeldsen KK, et al. Postglacial viability  
1002 and colonization in North America’s ice-free corridor. *Nature.* 2016; 1–15.
- 1003 103. Ohta T. Slightly deleterious mutant substitutions in evolution. *Nature.* 1973;246: 96–98.
- 1004 104. Xue Y, Prado-Martinez J, Sudmant PH, Narasimhan V, Ayub Q, Szpak M, et al. Mountain gorilla  
1005 genomes reveal the impact of long-term population decline and inbreeding. *Science.* 2015;348: 242–  
1006 245.
- 1007 105. Robinson JA, Brown C, Kim BY, Lohmueller KE, Wayne RK. Purging of Strongly Deleterious  
1008 Mutations Explains Long-Term Persistence and Absence of Inbreeding Depression in Island Foxes.  
1009 *Curr Biol.* 2018;28: 3487–3494.e4.

- 1010 106. Grossen C, Guillaume F, Keller LF, Croll D. Purging of highly deleterious mutations through  
1011 severe bottlenecks in Alpine ibex. *Nat Commun.* 2020;11: 1001.
- 1012 107. Bolger AM, Lohse M, Usadel B. Trimmomatic: a flexible trimmer for Illumina sequence data.  
1013 *Bioinformatics.* 2014;30: 2114–2120.
- 1014 108. Andrews S. FastQC: a quality control tool for high throughput sequence data. Babraham  
1015 *Bioinformatics*, Babraham Institute, Cambridge, United Kingdom; 2010.
- 1016 109. Grabherr MG, Russell P, Meyer M, Mauceli E, Alföldi J, Di Palma F, et al. Genome-wide  
1017 synteny through highly sensitive sequence alignment: Satsuma. *Bioinformatics.* 2010;26: 1145–  
1018 1151.
- 1019 110. Waterhouse RM, Seppey M, Simão FA, Manni M, Ioannidis P, Klioutchnikov G, et al. BUSCO  
1020 applications from quality assessments to gene prediction and phylogenomics. *Mol Biol Evol.*  
1021 2018;35: 543–548.
- 1022 111. Wu TD, Watanabe CK. GMAP: a genomic mapping and alignment program for mRNA and EST  
1023 sequences. *Bioinformatics.* 2005;21: 1859–1875.
- 1024 112. Li H, Durbin R. Fast and accurate short read alignment with Burrows-Wheeler transform.  
1025 *Bioinformatics.* 2009;25: 1754–1760.
- 1026 113. DePristo MA, Banks E, Poplin R, Garimella KV, Maguire JR, Hartl C, et al. A framework for  
1027 variation discovery and genotyping using next-generation DNA sequencing data. *Nat Genet.*  
1028 2011;43: 491–498.
- 1029 114. Okonechnikov K, Conesa A, García-Alcalde F. Qualimap 2: advanced multi-sample quality  
1030 control for high-throughput sequencing data. *Bioinformatics.* 2016;32: 292–294.
- 1031 115. McKenna A, Hanna M, Banks E, Sivachenko A, Cibulskis K, Kernytsky A, et al. The Genome  
1032 Analysis Toolkit: A MapReduce framework for analyzing next-generation DNA sequencing data.  
1033 *Genome Res.* 2010;20: 1297–1303.
- 1034 116. Danecek P, Auton A, Abecasis G, Albers CA, Banks E, DePristo MA, et al. The variant call  
1035 format and VCFtools. *Bioinformatics.* 2011;27: 2156–2158.
- 1036 117. Zheng X, Levine D, Shen J, Gogarten SM, Laurie C, Weir BS. A high-performance computing  
1037 toolset for relatedness and principal component analysis of SNP data. *Bioinformatics.* 2012;28:  
1038 3326–3328.
- 1039 118. Pritchard JK, Stephens M, Donnelly P. Inference of population structure using multilocus  
1040 genotype data. *Genetics.* 2000;155: 945–959.
- 1041 119. Beichman AC, Huerta-Sanchez E, Lohmueller KE. Using Genomic Data to Infer Historic  
1042 Population Dynamics of Nonmodel Organisms. *Annu Rev Ecol Evol Syst.* 2018 [cited 8 Feb 2021].  
1043 doi:10.1146/annurev-ecolsys-110617-062431
- 1044 120. Zhang C, Dong S-S, Xu J-Y, He W-M, Yang T-L. PopLDdecay: a fast and effective tool for  
1045 linkage disequilibrium decay analysis based on variant call format files. Schwartz R, editor.  
1046 *Bioinformatics.* 2018; 1–3.
- 1047 121. Charif D, Lobry JR. SeqinR 1.0-2: A Contributed Package to the R Project for Statistical

- 1048 Computing Devoted to Biological Sequences Retrieval and Analysis. In: Bastolla U, Porto M,  
1049 Roman HE, Vendruscolo M, editors. Structural Approaches to Sequence Evolution: Molecules,  
1050 Networks, Populations. Berlin, Heidelberg: Springer Berlin Heidelberg; 2007. pp. 207–232.
- 1051 122. Kuhn M, Others. Building predictive models in R using the caret package. J Stat Softw. 2008;28:  
1052 1–26.
- 1053 123. Wehrens R, Mevik B-H. The pls package: principal component and partial least squares  
1054 regression in R. 2007. Available: <https://repository.uibn.ru.nl/bitstream/handle/2066/36604/36604.pdf>
- 1055 124. Cingolani P, Platts A, Wang LL, Coon M, Nguyen T, Wang L, et al. A program for annotating  
1056 and predicting the effects of single nucleotide polymorphisms, SnpEff. Fly . 2012;6: 80–92.
- 1057 125. Miller JB, Pickett BD, Ridge PG. JustOrthologs: a fast, accurate and user-friendly ortholog  
1058 identification algorithm. Bioinformatics. 2019;35: 546–552.
- 1059 126. Ranwez V, Harispe S, Delsuc F, Douzery EJP. MACSE: Multiple Alignment of Coding  
1060 SEquences Accounting for Frameshifts and Stop Codons. PLoS ONE. 2011. p. e22594.  
1061 doi:10.1371/journal.pone.0022594
- 1062 127. Yang Z. PAML 4: phylogenetic analysis by maximum likelihood. Mol Biol Evol. 2007;24: 1586–  
1063 1591.
- 1064
